# Supplementary material for: Expression of prostaglandin E receptor subtype EP4 in conjunctival epithelium of patients with ocular surface disorders: case-control study
Source: PubMed Central journal article supplement — BMJ Open. 2012 Oct 11;2(5):e001330. doi: 10.1136/bmjopen-2012-001330 (PMC3488701; doi:10.1136/bmjopen-2012-001330), 2012-10-11
Supplement: bmjopen-2012-001330.draft_revisions.pdf [file bmjopen-2012-001330.draft_revisions.pdf]

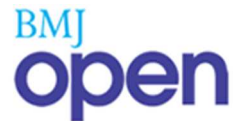

**Expression of prostaglandin E receptor subtype EP4 in conjunctival epithelium of patients with ocular surface disorders**

|                                 |                                                                                                                                                                                                                                                                                                                                                                                                                                                                                                                               |
|---------------------------------|-------------------------------------------------------------------------------------------------------------------------------------------------------------------------------------------------------------------------------------------------------------------------------------------------------------------------------------------------------------------------------------------------------------------------------------------------------------------------------------------------------------------------------|
| Journal:                        | <i>BMJ Open</i>                                                                                                                                                                                                                                                                                                                                                                                                                                                                                                               |
| Manuscript ID:                  | bmjopen-2012-001330                                                                                                                                                                                                                                                                                                                                                                                                                                                                                                           |
| Article Type:                   | Research                                                                                                                                                                                                                                                                                                                                                                                                                                                                                                                      |
| Date Submitted by the Author:   | 30-Apr-2012                                                                                                                                                                                                                                                                                                                                                                                                                                                                                                                   |
| Complete List of Authors:       | Ueta, Mayumi; Kyoto Prefectural University of Medicine, Department of Ophthalmology<br>Sotozono, Chie; Kyoto Prefectural Univ of Med, Ophthalmology<br>Yamada, Keiko; Kyoto Prefectural University of Medicine, Department of Ophthalmology<br>Yokoi, Norihiko; Kyoto Prefectural University of Medicine, Department of Ophthalmology<br>Inatomi, Tsutomu; Kyoto Prefectural University of Medicine, Department of Ophthalmology<br>Kinoshita, Shigeru; Kyoto Prefectural University of Medicine, Department of Ophthalmology |
| <b>Primary Subject Heading</b>: | Ophthalmology                                                                                                                                                                                                                                                                                                                                                                                                                                                                                                                 |
| Secondary Subject Heading:      | Ophthalmology                                                                                                                                                                                                                                                                                                                                                                                                                                                                                                                 |
| Keywords:                       | OPHTHALMOLOGY, Corneal and external diseases < OPHTHALMOLOGY, Histology < BASIC SCIENCES                                                                                                                                                                                                                                                                                                                                                                                                                                      |
|                                 |                                                                                                                                                                                                                                                                                                                                                                                                                                                                                                                               |

SCHOLARONE™  
Manuscripts

1  
2  
3  
4  
5 **Expression of prostaglandin E receptor subtype EP4 in conjunctival epithelium of**  
6  
7 **patients with ocular surface disorders: case-control study**  
8  
9

10  
11 Mayumi Ueta, MD, PhD,<sup>a,b</sup> Chie Sotozono, MD, PhD,<sup>a</sup> Keiko Yamada, MD,<sup>a</sup>

12  
13 Norihiko Yokoi, MD, PhD,<sup>a</sup> Tsutomu Inatomi, MD, PhD,<sup>a</sup> Shigeru Kinoshita, MD, PhD<sup>a</sup>  
14  
15

16  
17  
18 <sup>a</sup>Department of Ophthalmology, Kyoto Prefectural University of Medicine, Kyoto,  
19  
20  
21 Japan

22  
23 <sup>b</sup>Research Center for Inflammation and Regenerative Medicine, Faculty of Life and  
24  
25 Medical Sciences, Doshisha University, Kyoto, Japan  
26  
27

28  
29  
30 **Corresponding author:**

31  
32 Mayumi Ueta, MD, PhD

33  
34 Department of Ophthalmology

35  
36 Kyoto Prefectural University of Medicine

37  
38 465 Kajiicho, Hirokoji

39  
40 Kawaramachi, Kamigyoku

41  
42 Kyoto 602-0841, Japan

43  
44 Telephone: 81-75-251-5578

45  
46 Fax: 81-75-251-5663

47  
48 e-mail: mueta@koto.kpu-m.ac.jp  
49  
50  
51  
52  
53  
54  
55  
56  
57  
58  
59  
60

**Key words**

Prostaglandin E receptor subtype EP4, human conjunctival epithelium, chemical eye burn, Mooren's ulcer

**Abbreviations**

EP4: Prostaglandin E receptor subtype EP4  
SJS: Stevens-Johnson syndrome  
TEN: Toxic epidermal necrolysis  
GVHD: graft versus host disease  
OCP: ocular cicatricial pemphigoid  
RT-PCR: Reverse transcription polymerase chain reaction  
PG: Prostaglandin

1) substantial contributions to conception and design, acquisition of data, or analysis and interpretation of data; Mayumi Ueta, Chie Sotozono, Keiko Yamada, Norihiko Yokoi, Tsutomu Inatomi, Shigeru Kinoshita

2) drafting the article or revising it critically for important intellectual content; Mayumi Ueta, Chie Sotozono, Keiko Yamada, Norihiko Yokoi, Tsutomu Inatomi, Shigeru Kinoshita

3) final approval of the version to be published; Mayumi Ueta, Chie Sotozono, Keiko Yamada, Norihiko Yokoi, Tsutomu Inatomi, Shigeru Kinoshita

There is no additional data available.

Competing interest statement: none

**Abstract**

**Objectives:** To examine the expression of EP4 in conjunctival epithelium of patients with various ocular surface disorders.

**Design:** case-control study

**Setting & Participants:** Conjunctival tissues were obtained from patients undergoing surgical reconstruction of the ocular surface due to chemical eye burns, sub-acute and chronic stage SJS/TEN, chronic stage ocular cicatricial pemphigoid (OCP) or severe graft versus host disease (GVHD), and from patients with Mooren's ulcers treated by resection of the inflammatory conjunctiva. We performed immunohistological analysis of EP4 and quantitative RT-PCR analysis of conjunctival tissue sections to confirm the down-regulation of EP4 mRNA expression in patients with SJS/TEN and OCP.

Primary and secondary outcome measures: Expression of EP4 protein by immunohistological methods and expression of EP4 mRNA.

**Results:** EP4 protein was detected in conjunctival epithelium from patients with chemical eye burn and in control conjunctival epithelium from patients with conjunctivochalasis. The expression of EP4 protein varied in conjunctival epithelium from patients with Mooren's ulcer. We did not detect EP4 immunoreactivity in conjunctival epithelium from patients with subacute SJS/TEN, severe GVHD, chronic SJS/TEN, or OCP.

**Conclusions:** The strong down-regulation of EP4 expression in conjunctival epithelium from patients with OCP or SJS/TEN may be attributable to ocular surface inflammation.

## Introduction

The prostanoids PGD<sub>2</sub>, PGE<sub>2</sub>, PGF<sub>2α</sub>, PGI<sub>2</sub>, and TXA<sub>2</sub> are lipid mediators that form in response to various stimuli. They are released extracellularly immediately after their synthesis and they act by binding to a G-protein-coupled rhodopsin-type receptor on the surface of target cells. [1] PGE<sub>2</sub> was produced during inflammatory responses and it suppressed the production of cytokines and chemokines induced by lipopolysaccharide (LPS)-stimulated macrophages [2, 3] and dendritic cells. [4] Elsewhere we reported that PGE<sub>2</sub> modulates the expression of polyI:C-induced pro-inflammatory genes in human conjunctival epithelial cells. [5]

There are four PGE receptor subtypes, EP1, EP2, EP3, and EP4. Intestinal epithelium has been reported to express EP4 mRNA, [6] and intestinal homeostasis was maintained- and the immune response was down-regulated by EP4. [7] We documented that while normal human conjunctival epithelium expressed EP4 protein, it was down-regulated in devastating ocular surface inflammatory disorders such as chronic Stevens-Johnson syndrome (SJS)/Toxic epidermal necrolysis (TEN) and chronic ocular cicatricial pemphigoid (OCP). [8] Here we examine the expression of EP4 in conjunctival epithelium of patients with ocular surface disorders such as chemical eye burn, Mooren's ulcer, severe graft versus host disease (GVHD), and of patients in the subacute stage of SJS/TEN.

## Materials and Methods

### *Human conjunctival tissues*

This study was approved by the Institutional Review Board of Kyoto Prefectural University of Medicine, Kyoto, Japan. All experiments were conducted in accordance with the principles set forth in the Helsinki Declaration.

The controls for immunohistochemical analyses were nearly normal conjunctival tissues obtained during surgery for conjunctivochalasis. We also prepared human conjunctival tissues from samples obtained during surgery to reconstruct the ocular surface in 3 patients with chemical eye burn, 2 patients with sub-acute SJS/TEN, one patient with severe GVHD, and from 4 patients with Mooren's ulcer undergoing resection of inflammatory conjunctiva.

For quantitative RT-PCR the controls were nearly normal conjunctival tissues obtained at surgery for conjunctivochalasis. We also prepared human conjunctival tissues from samples obtained during surgery to reconstruct the ocular surface in 4 patients in the chronic stage of SJS/TEN and 4 OCP patients in the chronic stage.

### *Immunohistochemistry*

For EP4 staining we used rabbit polyclonal antibody to EP4 (Cayman Chemical Co., Ann Arbor, MI). The secondary antibody (Biotin-SP-conjugated AffiniPure F(ab')<sub>2</sub> fragment donkey anti-rabbit IgG (H+L), 1:500 dilution; Jackson Immuno Research, Baltimore, MD) was applied for 30 min. The VECTASTAIN ABC reagent (Vector Laboratories, Inc., Burlingame, CA) was used for increased sensitivity with peroxidase substrate solution (DAB substrate kit; Vector) as a chromogenic substrate.

### *Quantitative RT-PCR*

Total RNA was isolated from conjunctival tissue sections using the RNeasy mini kit (Qiagen) according to the manufacturer's instructions. The RT reaction was with the SuperScript™ preamplification kit (Invitrogen). Quantitative RT-PCR was on an ABI-prism 7700 instrument (Applied Biosystems, Foster City, CA). The probes for human PTGER4 and human GAPDH were from Applied Biosystems. For cDNA amplification we performed PCR in a 25- $\mu$ l total volume that contained a 1  $\mu$ l cDNA template in 2  $\times$  TaqMan universal PCR master mix (Applied Biosystems) at 50°C for 2 min and 95°C for 10 min, followed by 40 cycles at 95°C for 15 sec and 60°C for 1 min. The results were analyzed with sequence detection software (Applied Biosystems). The quantification data were normalized to the expression of the housekeeping gene GAPDH.

## Results

EP4 protein was detected in nearly normal conjunctival epithelium from patients with conjunctivochalasis (Fig. 1A) and in conjunctival tissues from 3 patients with chemical eye burn (Fig. 1B). Its expression varied in conjunctival epithelium from 4 patients with Mooren's ulcer (Fig. 1C): in one patient it was similar to the control, in 2 patients it was slightly lower than in the control, and in the remaining patient it was not detected. There was no EP4 immunoreactivity in conjunctival epithelium from 2 patients with subacute SJS/TEN (Fig. 1D), nor from patients with severe GVHD (Fig. 1E), as same as chronic SJS/TEN, or OCP. [8]

We found that, as in normal human conjunctival epithelium, EP4 is expressed in conjunctival epithelium from patients with chemical eye burn. On the other hand, it was strongly down-regulated in conjunctival epithelium from patients with SJS/TEN, OCP, or severe GVHD.

To confirm the down-regulation of EP4 in the ocular surface of SJS and OCP patients we examined the expression of PTGER4 mRNA in control conjunctival tissues from 6 conjunctival chalasis patients and in conjunctival tissues from 4 SJS/TEN- and 4 OCP patients. Representative findings of EP4 immunoreactivity in each of these groups are shown in Fig. 2A. Although EP4 protein was detected in tissues from patients with conjunctivochalasis (controls), conjunctival epithelium from SJS- and OCP patients did not manifest EP4 immunoreactivity. PTGER4 mRNA was significantly lower in conjunctival tissues from SJS and OCP patients than in the control conjunctivochalasis samples (Fig. 2B).



## Discussion

Elsewhere we reported the expression of EP4 in normal human conjunctival epithelium and its down-regulation in conjunctival epithelium from patients with SJS/TEN and OCP. [8] Here we document that EP4 is expressed normally in conjunctival epithelium from patients with severe chemical eye burn which, like SJS/TEN and OCP, is a devastating ocular surface disorder. We also confirmed that in conjunctival tissues from SJS/TEN and OCP patients its mRNA expression was significantly down-regulated.

On the ocular surface of patients with severe chemical eye burn, conjunctival invasion into the cornea may occur due to the stem cell deficiency of corneal epithelial cells. This results in devastating ocular surface disorders similar to OCP and SJS/TEN. However, in the conjunctiva of patients with severe chemical eye burns, EP4 expression was not down-regulated.

In patients with Mooren's ulcer, an ocular surface inflammatory disease, the expression of EP4 protein varied; in some patients it was down-regulated. In patients in the sub-acute stage of SJS/TEN with ocular surface inflammation, the expression of EP4 protein was remarkably down-regulated.

Kabashima et al. [7] reported that in mice, EP4 deficiency impaired mucosal barrier function and induced the aggregation of lymphocytes and neutrophils in the colon, and that the administration of an EP4-selective agonist to wild-type mice ameliorated severe colitis. In mice treated with an EP4-selective antagonist the recovery from colitis was suppressed, leading them to conclude that EP4 maintains intestinal homeostasis by preserving mucosal integrity and down-regulating the immune response. On the other hand, Yao et al. [9] found that PGE<sub>2</sub> acting on its receptor EP4 on T- and dendritic cells

1  
2  
3  
4  
5 not only facilitated T<sub>H</sub>1 cell differentiation but also amplified interleukin-23-mediated  
6  
7 T<sub>H</sub>17 cell expansion *in vitro*. The administration of an EP4-selective antagonist to mice  
8  
9 with experimental autoimmune encephalomyelitis or contact hypersensitivity decreased  
10  
11 the accumulation of both T<sub>H</sub>1 and T<sub>H</sub>17 cells in regional lymph nodes and suppressed  
12  
13 disease progression. Based on these observations they concluded that PGE<sub>2</sub>-EP4  
14  
15 signaling promotes immune inflammation.  
16  
17

18  
19 In human conjunctival tissues EP4 protein was expressed in epithelial cells but  
20  
21 not in cells infiltrating subconjunctival tissues. We posit that the down-regulation of EP4  
22  
23 in conjunctival epithelium is associated with the ocular surface inflammation seen in  
24  
25 patients with OCP, SJS/TEN, and Mooren's ulcer because as in the acute or sub-acute  
26  
27 stage, patients in the chronic phase of OCP and SJS/TEN manifested mucosal  
28  
29 inflammation on the ocular surface.  
30  
31

32  
33 On the other hand, elsewhere we reported that although EP3 and EP2 agonists  
34  
35 suppressed the production of CCL5, CXCL11, and CCL20 in response to polyI:C  
36  
37 stimulation, these chemokines were not suppressed by the EP4 agonist in human  
38  
39 conjunctival epithelial cells. [5] Studies are underway in our laboratory to elucidate the  
40  
41 function of EP4 in conjunctival epithelial cells.  
42

43  
44 In summary, EP4 is expressed not only in normal conjunctival epithelium but also  
45  
46 in conjunctival epithelium from patients with chemical eye burns and some patients with  
47  
48 Mooren's ulcer. On the other hand, it is strongly down-regulated in conjunctival  
49  
50 epithelium from patients with OCP and chronic- and subacute SJS/TEN.  
51  
52  
53  
54  
55  
56  
57  
58  
59  
60

## Figure Legends

### Figure 1

Immunohistological analysis of prostaglandin E receptor subtype EP4 in conjunctival epithelium of patients with ocular surface diseases.

- A. Nearly normal conjunctival tissues from patients with conjunctivochalasis.
- B. Conjunctival tissues of chemical eye burn patients in need of ocular surface reconstruction.
- C. Inflammatory conjunctival tissues of patients with active Mooren's ulcer requiring resection of the inflammatory conjunctiva.
- D. Conjunctival tissues of SJS/TEN patients in the sub-acute stage.
- E. Conjunctival tissues of a patient with severe GVHD.

Each scale bar represents 100  $\mu\text{m}$ .

### Figure 2

The expression of PTGER4 mRNA in conjunctival tissues from patients with SJS/TEN, OCP and the controls.

- A. Representative findings of EP4 immunoreactivity of each group (control, SJS/TEN, OCP).
- B. Expression of PTGER4 mRNA in human conjunctival tissues (\* $p < 0.05$ ).

## References

1. Matsuoka T, Narumiya S: **Prostaglandin receptor signaling in disease.** *ScientificWorldJournal* 2007, **7**:1329-1347.
2. Takayama K, Garcia-Cardena G, Sukhova GK, *et al.*: **Prostaglandin E2 suppresses chemokine production in human macrophages through the EP4 receptor.** *J Biol Chem* 2002, **277**:44147-44154.
3. Xu XJ, Reichner JS, Mastrofrancesco B, *et al.*: **Prostaglandin E2 suppresses lipopolysaccharide-stimulated IFN-beta production.** *J Immunol* 2008, **180**:2125-2131.
4. Shiraishi H, Yoshida H, Saeki K, *et al.*: **Prostaglandin E2 is a major soluble factor produced by stromal cells for preventing inflammatory cytokine production from dendritic cells.** *Int Immunol* 2008, **20**:1219-1229.
5. Ueta M, Matsuoka T, Yokoi N, *et al.*: **Prostaglandin E2 suppresses polyinosine-polycytidylic acid (polyI:C)-stimulated cytokine production via prostaglandin E2 receptor (EP) 2 and 3 in human conjunctival epithelial cells.** *Br J Ophthalmol* 2011, **95**:859-863.
6. Morimoto K, Sugimoto Y, Katsuyama M, *et al.*: **Cellular localization of mRNAs for prostaglandin E receptor subtypes in mouse gastrointestinal tract.** *Am J Physiol* 1997, **272**:G681-687.
7. Kabashima K, Saji T, Murata T, *et al.*: **The prostaglandin receptor EP4 suppresses colitis, mucosal damage and CD4 cell activation in the gut.** *J Clin Invest* 2002, **109**:883-893.
8. Ueta M, Sotozono C, Yokoi N, *et al.*: **Prostaglandin E receptor 4 expression in**

1  
2  
3  
4  
5 **human conjunctival epithelium and its downregulation in devastating**  
6 **ocular surface inflammatory disorders.** *Arch Ophthalmol* 2010,  
7  
8  
9 **128**(10):1369-1371.

- 10  
11  
12 9. Yao C, Sakata D, Esaki Y, *et al*: **Prostaglandin E2-EP4 signaling promotes**  
13 **immune inflammation through Th1 cell differentiation and Th17 cell**  
14 **expansion.** *Nat Med* 2009, **15**:633-640.  
15  
16  
17  
18  
19  
20  
21  
22  
23  
24  
25  
26  
27  
28  
29  
30  
31  
32  
33  
34  
35  
36  
37  
38  
39  
40  
41  
42  
43  
44  
45  
46  
47  
48  
49  
50  
51  
52  
53  
54  
55  
56  
57  
58  
59  
60

## ACKNOWLEDGMENTS

We thank Chikako Endo for technical assistance. This work was supported in part by grants-in-aid for scientific research from the Japanese Ministry of Health, Labour and Welfare, the Japanese Ministry of Education, Culture, Sports, Science and Technology, CREST from JST, a research grant from the Kyoto Foundation for the Promotion of Medical Science, the Intramural Research Fund of Kyoto Prefectural University of Medicine, and an Immunological Research Grant from the Shimizu Foundation.

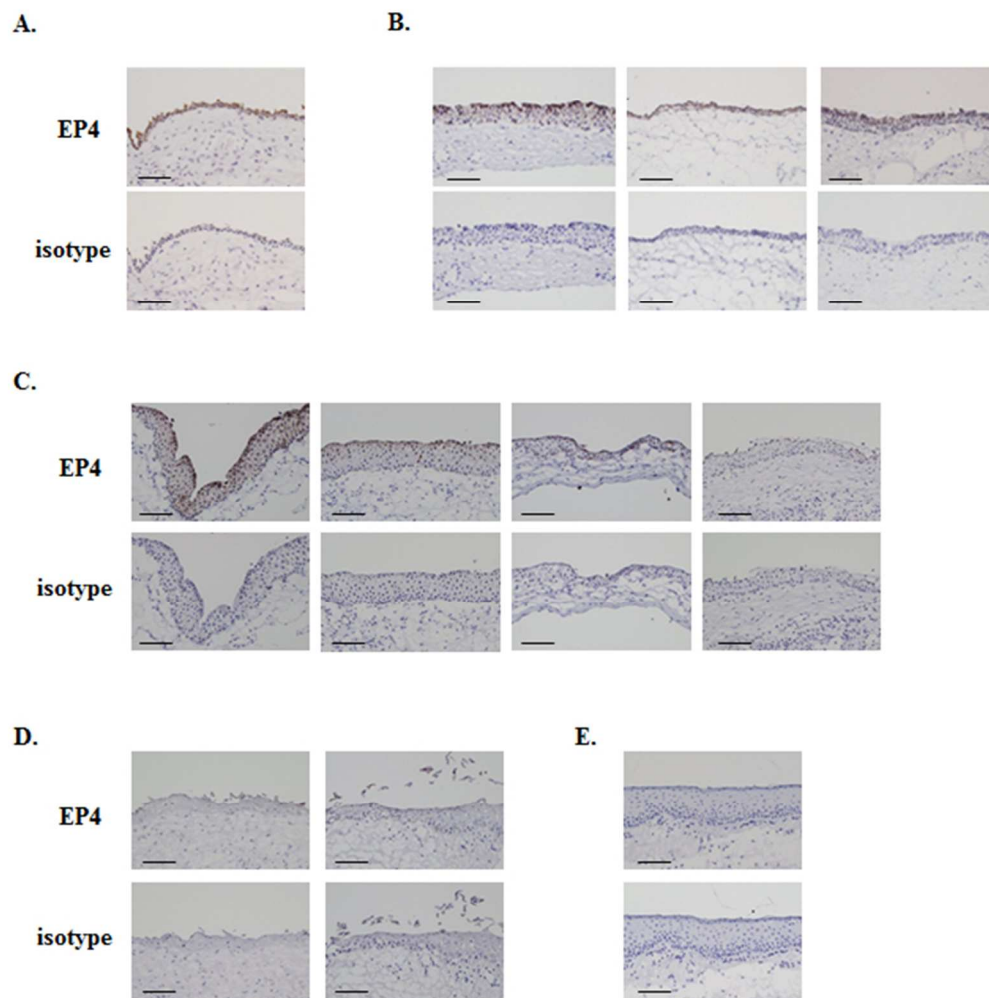

Immunohistological analysis of prostaglandin E receptor subtype EP4 in conjunctival epithelium of patients with ocular surface diseases. 53x53mm (300 x 300 DPI)

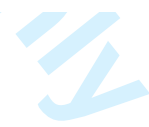

1  
2  
3  
4  
5  
6  
7  
8  
9  
10  
11  
12  
13  
14  
15  
16  
17  
18  
19  
20  
21  
22  
23  
24  
25  
26  
27  
28  
29  
30  
31  
32  
33  
34  
35  
36  
37  
38  
39  
40  
41  
42  
43  
44  
45  
46  
47  
48  
49  
50  
51  
52  
53  
54  
55  
56  
57  
58  
59  
60

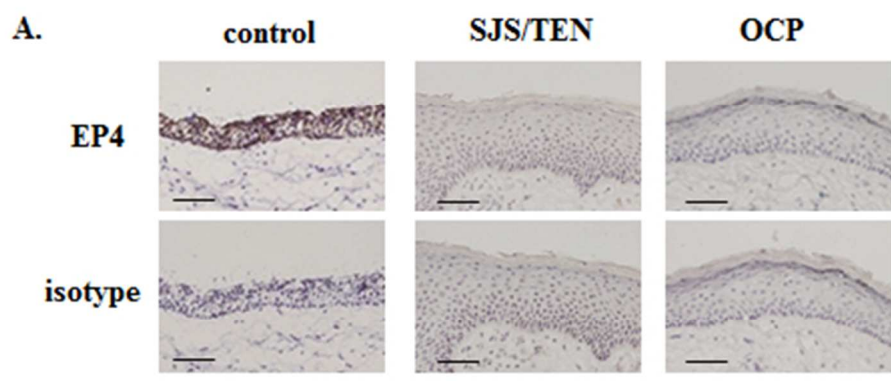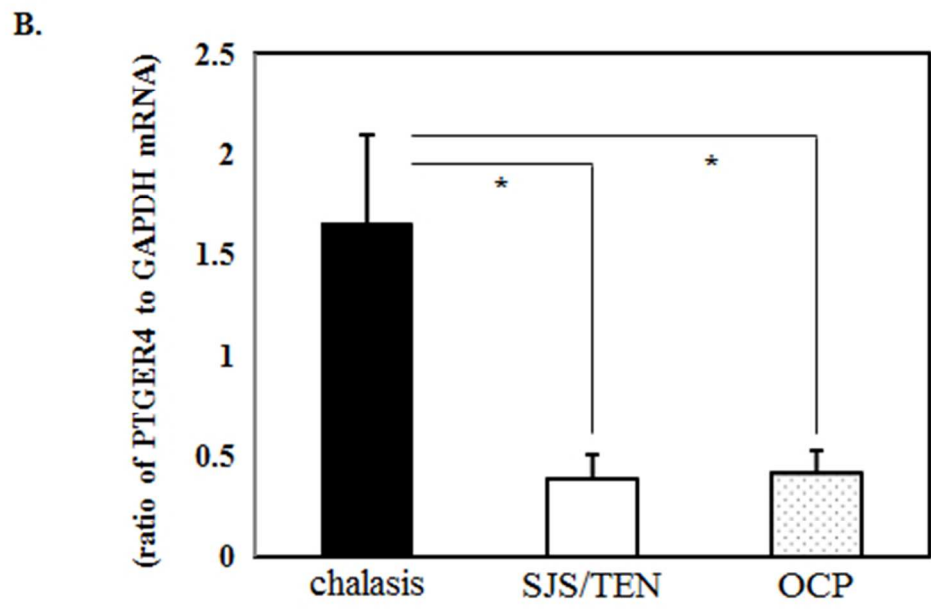

40x45mm (300 x 300 DPI)

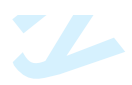



STROBE 2007 (v4) Statement—Checklist of items that should be included in reports of *case-control studies*

| Section/Topic                | Item # | Recommendation                                                                                                                                                                       | Reported on page # |
|------------------------------|--------|--------------------------------------------------------------------------------------------------------------------------------------------------------------------------------------|--------------------|
| Title and abstract           | 1      | (a) Indicate the study's design with a commonly used term in the title or the abstract                                                                                               | 1                  |
|                              |        | (b) Provide in the abstract an informative and balanced summary of what was done and what was found                                                                                  | 3                  |
| <b>Introduction</b>          |        |                                                                                                                                                                                      |                    |
| Background/rationale         | 2      | Explain the scientific background and rationale for the investigation being reported                                                                                                 | 4                  |
| Objectives                   | 3      | State specific objectives, including any prespecified hypotheses                                                                                                                     | 4                  |
| <b>Methods</b>               |        |                                                                                                                                                                                      |                    |
| Study design                 | 4      | Present key elements of study design early in the paper                                                                                                                              | 5                  |
| Setting                      | 5      | Describe the setting, locations, and relevant dates, including periods of recruitment, exposure, follow-up, and data collection                                                      | 5                  |
| Participants                 | 6      | (a) Give the eligibility criteria, and the sources and methods of case ascertainment and control selection. Give the rationale for the choice of cases and controls                  | 5                  |
|                              |        | (b) For matched studies, give matching criteria and the number of controls per case                                                                                                  |                    |
| Variables                    | 7      | Clearly define all outcomes, exposures, predictors, potential confounders, and effect modifiers. Give diagnostic criteria, if applicable                                             | 5                  |
| Data sources/<br>measurement | 8*     | For each variable of interest, give sources of data and details of methods of assessment (measurement). Describe comparability of assessment methods if there is more than one group | 5                  |
| Bias                         | 9      | Describe any efforts to address potential sources of bias                                                                                                                            |                    |
| Study size                   | 10     | Explain how the study size was arrived at                                                                                                                                            |                    |
| Quantitative variables       | 11     | Explain how quantitative variables were handled in the analyses. If applicable, describe which groupings were chosen and why                                                         | 5                  |
| Statistical methods          | 12     | (a) Describe all statistical methods, including those used to control for confounding                                                                                                | 6                  |
|                              |        | (b) Describe any methods used to examine subgroups and interactions                                                                                                                  |                    |
|                              |        | (c) Explain how missing data were addressed                                                                                                                                          |                    |
|                              |        | (d) If applicable, explain how matching of cases and controls was addressed                                                                                                          |                    |
|                              |        | (e) Describe any sensitivity analyses                                                                                                                                                |                    |
| <b>Results</b>               |        |                                                                                                                                                                                      |                    |

|                          |     |                                                                                                                                                                                                                                                                                                                                                                                                               |     |
|--------------------------|-----|---------------------------------------------------------------------------------------------------------------------------------------------------------------------------------------------------------------------------------------------------------------------------------------------------------------------------------------------------------------------------------------------------------------|-----|
| Participants             | 13* | (a) Report numbers of individuals at each stage of study—eg numbers potentially eligible, examined for eligibility, confirmed eligible, included in the study, completing follow-up, and analysed<br>(b) Give reasons for non-participation at each stage<br>(c) Consider use of a flow diagram                                                                                                               |     |
| Descriptive data         | 14* | (a) Give characteristics of study participants (eg demographic, clinical, social) and information on exposures and potential confounders<br>(b) Indicate number of participants with missing data for each variable of interest                                                                                                                                                                               | 7   |
| Outcome data             | 15* | Report numbers in each exposure category, or summary measures of exposure                                                                                                                                                                                                                                                                                                                                     |     |
| Main results             | 16  | (a) Give unadjusted estimates and, if applicable, confounder-adjusted estimates and their precision (eg, 95% confidence interval). Make clear which confounders were adjusted for and why they were included<br>(b) Report category boundaries when continuous variables were categorized<br>(c) If relevant, consider translating estimates of relative risk into absolute risk for a meaningful time period |     |
| Other analyses           | 17  | Report other analyses done—eg analyses of subgroups and interactions, and sensitivity analyses                                                                                                                                                                                                                                                                                                                |     |
| <b>Discussion</b>        |     |                                                                                                                                                                                                                                                                                                                                                                                                               |     |
| Key results              | 18  | Summarise key results with reference to study objectives                                                                                                                                                                                                                                                                                                                                                      | 7   |
| Limitations              | 19  | Discuss limitations of the study, taking into account sources of potential bias or imprecision.<br>Discuss both direction and magnitude of any potential bias                                                                                                                                                                                                                                                 |     |
| Interpretation           | 20  | Give a cautious overall interpretation of results considering objectives, limitations, multiplicity of analyses, results from similar studies, and other relevant evidence                                                                                                                                                                                                                                    |     |
| Generalisability         | 21  | Discuss the generalisability (external validity) of the study results                                                                                                                                                                                                                                                                                                                                         | 8   |
| <b>Other information</b> |     |                                                                                                                                                                                                                                                                                                                                                                                                               |     |
| Funding                  | 22  | Give the source of funding and the role of the funders for the present study and, if applicable, for the original study on which the present article is based                                                                                                                                                                                                                                                 | 1 3 |

\*Give information separately for cases and controls in case-control studies and, if applicable, for exposed and unexposed groups in cohort and cross-sectional studies.

**Note:** An Explanation and Elaboration article discusses each checklist item and gives methodological background and published examples of transparent reporting. The STROBE checklist is best used in conjunction with this article (freely available on the Web sites of PLoS Medicine at <http://www.plosmedicine.org/>, Annals of Internal Medicine at <http://www.annals.org/>, and Epidemiology at <http://www.epidem.com/>). Information on the STROBE Initiative is available at [www.strobe-statement.org](http://www.strobe-statement.org).



**Expression of prostaglandin E receptor subtype EP4 in conjunctival epithelium of patients with ocular surface disorders**

|                                 |                                                                                                                                                                                                                                                                                                                                                                                                                                                                                                                               |
|---------------------------------|-------------------------------------------------------------------------------------------------------------------------------------------------------------------------------------------------------------------------------------------------------------------------------------------------------------------------------------------------------------------------------------------------------------------------------------------------------------------------------------------------------------------------------|
| Journal:                        | <i>BMJ Open</i>                                                                                                                                                                                                                                                                                                                                                                                                                                                                                                               |
| Manuscript ID:                  | bmjopen-2012-001330.R1                                                                                                                                                                                                                                                                                                                                                                                                                                                                                                        |
| Article Type:                   | Research                                                                                                                                                                                                                                                                                                                                                                                                                                                                                                                      |
| Date Submitted by the Author:   | 28-Jun-2012                                                                                                                                                                                                                                                                                                                                                                                                                                                                                                                   |
| Complete List of Authors:       | Ueta, Mayumi; Kyoto Prefectural University of Medicine, Department of Ophthalmology<br>Sotozono, Chie; Kyoto Prefectural Univ of Med, Ophthalmology<br>Yamada, Keiko; Kyoto Prefectural University of Medicine, Department of Ophthalmology<br>Yokoi, Norihiko; Kyoto Prefectural University of Medicine, Department of Ophthalmology<br>Inatomi, Tsutomu; Kyoto Prefectural University of Medicine, Department of Ophthalmology<br>Kinoshita, Shigeru; Kyoto Prefectural University of Medicine, Department of Ophthalmology |
| <b>Primary Subject Heading</b>: | Ophthalmology                                                                                                                                                                                                                                                                                                                                                                                                                                                                                                                 |
| Secondary Subject Heading:      | Ophthalmology                                                                                                                                                                                                                                                                                                                                                                                                                                                                                                                 |
| Keywords:                       | OPHTHALMOLOGY, Corneal and external diseases < OPHTHALMOLOGY, Histology < BASIC SCIENCES                                                                                                                                                                                                                                                                                                                                                                                                                                      |
|                                 |                                                                                                                                                                                                                                                                                                                                                                                                                                                                                                                               |

SCHOLARONE™  
Manuscripts

STROBE 2007 (v4) Statement—Checklist of items that should be included in reports of *case-control studies*

| Section/Topic                | Item # | Recommendation                                                                                                                                                                       | Reported on page # |
|------------------------------|--------|--------------------------------------------------------------------------------------------------------------------------------------------------------------------------------------|--------------------|
| Title and abstract           | 1      | (a) Indicate the study's design with a commonly used term in the title or the abstract                                                                                               | 1                  |
|                              |        | (b) Provide in the abstract an informative and balanced summary of what was done and what was found                                                                                  | 3                  |
| <b>Introduction</b>          |        |                                                                                                                                                                                      |                    |
| Background/rationale         | 2      | Explain the scientific background and rationale for the investigation being reported                                                                                                 | 4                  |
| Objectives                   | 3      | State specific objectives, including any prespecified hypotheses                                                                                                                     | 4                  |
| <b>Methods</b>               |        |                                                                                                                                                                                      |                    |
| Study design                 | 4      | Present key elements of study design early in the paper                                                                                                                              | 5                  |
| Setting                      | 5      | Describe the setting, locations, and relevant dates, including periods of recruitment, exposure, follow-up, and data collection                                                      | 5                  |
| Participants                 | 6      | (a) Give the eligibility criteria, and the sources and methods of case ascertainment and control selection. Give the rationale for the choice of cases and controls                  | 5                  |
|                              |        | (b) For matched studies, give matching criteria and the number of controls per case                                                                                                  |                    |
| Variables                    | 7      | Clearly define all outcomes, exposures, predictors, potential confounders, and effect modifiers. Give diagnostic criteria, if applicable                                             | 5                  |
| Data sources/<br>measurement | 8*     | For each variable of interest, give sources of data and details of methods of assessment (measurement). Describe comparability of assessment methods if there is more than one group | 5                  |
| Bias                         | 9      | Describe any efforts to address potential sources of bias                                                                                                                            |                    |
| Study size                   | 10     | Explain how the study size was arrived at                                                                                                                                            |                    |
| Quantitative variables       | 11     | Explain how quantitative variables were handled in the analyses. If applicable, describe which groupings were chosen and why                                                         | 5                  |
| Statistical methods          | 12     | (a) Describe all statistical methods, including those used to control for confounding                                                                                                | 6                  |
|                              |        | (b) Describe any methods used to examine subgroups and interactions                                                                                                                  |                    |
|                              |        | (c) Explain how missing data were addressed                                                                                                                                          |                    |
|                              |        | (d) If applicable, explain how matching of cases and controls was addressed                                                                                                          |                    |
|                              |        | (e) Describe any sensitivity analyses                                                                                                                                                |                    |
| <b>Results</b>               |        |                                                                                                                                                                                      |                    |

|                          |     |                                                                                                                                                                                                                                                                                                                                                                                                               |     |
|--------------------------|-----|---------------------------------------------------------------------------------------------------------------------------------------------------------------------------------------------------------------------------------------------------------------------------------------------------------------------------------------------------------------------------------------------------------------|-----|
| Participants             | 13* | (a) Report numbers of individuals at each stage of study—eg numbers potentially eligible, examined for eligibility, confirmed eligible, included in the study, completing follow-up, and analysed<br>(b) Give reasons for non-participation at each stage<br>(c) Consider use of a flow diagram                                                                                                               |     |
| Descriptive data         | 14* | (a) Give characteristics of study participants (eg demographic, clinical, social) and information on exposures and potential confounders<br>(b) Indicate number of participants with missing data for each variable of interest                                                                                                                                                                               | 7   |
| Outcome data             | 15* | Report numbers in each exposure category, or summary measures of exposure                                                                                                                                                                                                                                                                                                                                     |     |
| Main results             | 16  | (a) Give unadjusted estimates and, if applicable, confounder-adjusted estimates and their precision (eg, 95% confidence interval). Make clear which confounders were adjusted for and why they were included<br>(b) Report category boundaries when continuous variables were categorized<br>(c) If relevant, consider translating estimates of relative risk into absolute risk for a meaningful time period |     |
| Other analyses           | 17  | Report other analyses done—eg analyses of subgroups and interactions, and sensitivity analyses                                                                                                                                                                                                                                                                                                                |     |
| <b>Discussion</b>        |     |                                                                                                                                                                                                                                                                                                                                                                                                               |     |
| Key results              | 18  | Summarise key results with reference to study objectives                                                                                                                                                                                                                                                                                                                                                      | 7   |
| Limitations              | 19  | Discuss limitations of the study, taking into account sources of potential bias or imprecision.<br>Discuss both direction and magnitude of any potential bias                                                                                                                                                                                                                                                 |     |
| Interpretation           | 20  | Give a cautious overall interpretation of results considering objectives, limitations, multiplicity of analyses, results from similar studies, and other relevant evidence                                                                                                                                                                                                                                    |     |
| Generalisability         | 21  | Discuss the generalisability (external validity) of the study results                                                                                                                                                                                                                                                                                                                                         | 8   |
| <b>Other information</b> |     |                                                                                                                                                                                                                                                                                                                                                                                                               |     |
| Funding                  | 22  | Give the source of funding and the role of the funders for the present study and, if applicable, for the original study on which the present article is based                                                                                                                                                                                                                                                 | 1 3 |

\*Give information separately for cases and controls in case-control studies and, if applicable, for exposed and unexposed groups in cohort and cross-sectional studies.

**Note:** An Explanation and Elaboration article discusses each checklist item and gives methodological background and published examples of transparent reporting. The STROBE checklist is best used in conjunction with this article (freely available on the Web sites of PLoS Medicine at <http://www.plosmedicine.org/>, Annals of Internal Medicine at <http://www.annals.org/>, and Epidemiology at <http://www.epidem.com/>). Information on the STROBE Initiative is available at [www.strobe-statement.org](http://www.strobe-statement.org).

1  
2  
3  
4  
5 **Expression of prostaglandin E receptor subtype EP4 in conjunctival epithelium of**  
6  
7 **patients with ocular surface disorders: Case-control study**  
8  
9

10  
11 Mayumi Ueta, MD, PhD,<sup>a,b</sup> Chie Sotozono, MD, PhD,<sup>a</sup> Keiko Yamada, MD,<sup>a</sup>

12  
13 Norihiko Yokoi, MD, PhD,<sup>a</sup> Tsutomu Inatomi, MD, PhD,<sup>a</sup> Shigeru Kinoshita, MD, PhD<sup>a</sup>  
14  
15

16  
17  
18 <sup>a</sup>Department of Ophthalmology, Kyoto Prefectural University of Medicine, Kyoto,  
19  
20  
21 Japan

22  
23 <sup>b</sup>Research Center for Inflammation and Regenerative Medicine, Faculty of Life and  
24  
25 Medical Sciences, Doshisha University, Kyoto, Japan  
26  
27

28  
29  
30 **Corresponding author:**

31  
32 Mayumi Ueta, MD, PhD

33  
34 Department of Ophthalmology

35  
36 Kyoto Prefectural University of Medicine

37  
38 465 Kajiicho, Hirokoji

39  
40 Kawaramachi, Kamigyoku

41  
42 Kyoto 602-0841, Japan

43  
44 Telephone: 81-75-251-5578

45  
46 Fax: 81-75-251-5663

47  
48 e-mail: mueta@koto.kpu-m.ac.jp  
49  
50  
51  
52  
53  
54  
55  
56  
57  
58  
59  
60

**Key words**

Prostaglandin E receptor subtype EP4, human conjunctival epithelium, chemical eye burn, Mooren's ulcer

**Abbreviations**

EP4: Prostaglandin E receptor subtype EP4

SJS: Stevens-Johnson syndrome

TEN: Toxic epidermal necrolysis

GVHD: Graft versus host disease

OCP: Ocular cicatricial pemphigoid

RT-PCR: Reverse transcription polymerase chain reaction

PG: Prostaglandin

- 1) Substantial contributions to conception and design, acquisition of data, or analysis and interpretation of data: Mayumi Ueta, Chie Sotozono, Keiko Yamada, Norihiko Yokoi, Tsutomu Inatomi, Shigeru Kinoshita
- 2) Drafting the article or revising it critically for important intellectual content: Mayumi Ueta, Chie Sotozono, Keiko Yamada, Norihiko Yokoi, Tsutomu Inatomi, Shigeru Kinoshita
- 3) Final approval of the version to be published; Mayumi Ueta, Chie Sotozono, Keiko Yamada, Norihiko Yokoi, Tsutomu Inatomi, Shigeru Kinoshita

No additional data are available.

Competing interest statement: None

**Abstract**

**Objectives:** To confirm the down-regulation of PTGER4 mRNA in the conjunctiva of SJS/TEN and OCP patients and to examine the expression of its EP4 protein in the conjunctival epithelium of patients with various ocular surface disorders.

**Design:** Case-control study

**Setting & Participants:** We performed quantitative RT-PCR analysis of EP4 in conjunctival tissue sections from patients with SJS/TEN and OCP to confirm the down-regulation of EP4 mRNA expression. We also analyzed EP4 immunohistologically in other ocular surface disorders. Conjunctival tissues were obtained from patients undergoing surgical reconstruction of the ocular surface due to chemical eye burns, sub-acute- or chronic SJS/TEN, chronic ocular cicatricial pemphigoid (OCP), severe graft versus host disease (GVHD), and from patients with Mooren's ulcers treated by resection of the inflammatory conjunctiva.

**Primary and secondary outcome measures:** The expression of EP4 mRNA and EP4 protein assessed by quantitative RT-PCR assay and immunohistological methods.

**Results:** PTGER4 mRNA was significantly lower in conjunctival tissues from SJS and OCP patients than in the control conjunctivochalasis samples. EP4 protein was detected in conjunctival epithelium from patients with chemical eye burn and in control conjunctival epithelium from patients with conjunctivochalasis. Its expression varied in conjunctival epithelium from patients with Mooren's ulcer. We did not detect EP4 immunoreactivity in conjunctival epithelium from patients with subacute SJS/TEN, severe GVHD, chronic SJS/TEN, or OCP.

**Conclusions:** The strong down-regulation of EP4 expression in conjunctival epithelium from patients with OCP or SJS/TEN may be attributable to ocular surface inflammation.



## Introduction

The prostanoids PGD<sub>2</sub>, PGE<sub>2</sub>, PGF<sub>2α</sub>, PGI<sub>2</sub>, and TXA<sub>2</sub> are lipid mediators that form in response to various stimuli. They are released extracellularly immediately after their synthesis and they act by binding to a G-protein-coupled rhodopsin-type receptor on the surface of target cells [1]. PGE<sub>2</sub> is produced during inflammatory responses and it suppresses the production of cytokines and chemokines induced by lipopolysaccharide (LPS)-stimulated macrophages [2, 3] and dendritic cells [4]. Elsewhere we reported that PGE<sub>2</sub> modulates the expression of polyI:C-induced pro-inflammatory genes in human conjunctival epithelial cells [5].

There are four PGE receptor subtypes, EP1, EP2, EP3, and EP4. The intestinal epithelium has been reported to express EP4 mRNA [6] and intestinal homeostasis was maintained and the immune response down-regulated by EP4 [7]. We documented that while normal human conjunctival epithelium expressed EP4 protein, it was down-regulated in devastating ocular surface inflammatory disorders such as chronic Stevens-Johnson syndrome (SJS)/toxic epidermal necrolysis (TEN) and chronic ocular cicatricial pemphigoid (OCP) [8]. Here we examined the mRNA expression of EP4 in the conjunctiva of SJS/TEN and OCP patients in the chronic stage to confirm that EP4 is down-regulated in their conjunctiva. We also examined the expression of EP4 protein in the conjunctival epithelium of patients with various ocular surface disorders such as chemical eye burn, Mooren's ulcer, severe graft versus host disease (GVHD), and of patients in the sub-acute stage of SJS/TEN.

## Materials and Methods

### *Human conjunctival tissues*

This study was approved by the Institutional Review Board of Kyoto Prefectural University of Medicine, Kyoto, Japan. All experiments were conducted in accordance with the principles set forth in the Helsinki Declaration.

For quantitative RT-PCR the controls were nearly normal conjunctival tissues obtained at surgery for conjunctivochalasis. We also prepared human conjunctival tissues from samples obtained during surgery to reconstruct the ocular surface in 4 patients in the chronic stage of SJS/TEN and 4 patients in the chronic stage of OCP.

The controls for immunohistochemical analyses were nearly normal conjunctival tissues obtained during surgery for conjunctivochalasis, a disease in which the conjunctiva relaxes due to aging, resulting in a foreign body sensation on the ocular surface. We also prepared human conjunctival tissues from samples obtained during surgery to reconstruct the ocular surface in 3 patients with chemical (alkali) eye burn (2 in the chronic- and one in the sub-acute stage), 2 patients with sub-acute SJS/TEN, one patient with severe GVHD, and from 4 patients with Mooren's ulcer undergoing resection of inflammatory conjunctiva. SJS/TEN, OCP, Mooren's ulcer, chemical burn, and GVHD are all ocular surface inflammatory diseases with persistent inflammation on the ocular surface not only in the acute- but also in the chronic stage.

### *Quantitative RT-PCR*

Total RNA was isolated from conjunctival tissue sections using the RNeasy mini kit (Qiagen) according to the manufacturer's instructions. The RT reaction was with the SuperScript<sup>TM</sup> preamplification kit (Invitrogen). Quantitative RT-PCR was on an

1  
2  
3  
4  
5 ABI-prism 7700 instrument (Applied Biosystems, Foster City, CA). The probes for  
6  
7 human PTGER4 and human GAPDH were from Applied Biosystems. For cDNA  
8  
9 amplification we performed PCR in a 25- $\mu$ l total volume that contained a 1- $\mu$ l cDNA  
10  
11 template in 2  $\times$  TaqMan universal PCR master mix (Applied Biosystems) at 50°C for 2  
12  
13 min and 95°C for 10 min, followed by 40 cycles at 95°C for 15 sec and 60°C for 1 min.  
14  
15 The results were analyzed with sequence detection software (Applied Biosystems). The  
16  
17 quantification data were normalized to the expression of the housekeeping gene GAPDH.  
18  
19  
20  
21  
22

### 23 *Immunohistochemistry*

24  
25 For EP4 staining we used rabbit polyclonal antibody to EP4 (Cayman Chemical  
26  
27 Co., Ann Arbor, MI). The secondary antibody (Biotin-SP-conjugated AffiniPure F(ab')<sub>2</sub>  
28  
29 fragment donkey anti-rabbit IgG (H+L), 1:500 dilution; Jackson Immuno Research,  
30  
31 Baltimore, MD) was applied for 30 min. The VECTASTAIN ABC reagent (Vector  
32  
33 Laboratories, Inc., Burlingame, CA) was used for increased sensitivity with peroxidase  
34  
35 substrate solution (DAB substrate kit; Vector) as a chromogenic substrate.  
36  
37  
38  
39  
40  
41  
42  
43  
44  
45  
46  
47  
48  
49  
50  
51  
52  
53  
54  
55  
56  
57  
58  
59  
60

## Results

To confirm the down-regulation of EP4 in the ocular surface of SJS and OCP patients we examined the expression of PTGER4 mRNA in control conjunctival tissues from 6 conjunctival chalasis patients and in conjunctival tissues from 4 SJS/TEN- and 4 OCP patients. Representative findings of EP4 immunoreactivity in each of these groups are shown in Fig. 1A. Although EP4 protein was detected in the control tissues, conjunctival epithelium from SJS- and OCP patients did not manifest EP4 immunoreactivity. PTGER4 mRNA was significantly lower in conjunctival tissues from SJS and OCP patients than in the control conjunctivochalasis samples (Fig. 1B).

EP4 protein was detected in nearly normal conjunctival epithelium from patients with conjunctivochalasis (Fig. 2A) and in conjunctival tissues from 3 patients with chemical eye burn (Fig. 2B). Its expression varied in conjunctival epithelium from 4 patients with Mooren's ulcer (Fig. 2C): in one patient it was similar to the control, in 2 it was slightly lower than in the control, and in the remaining patient it was not detected. There was no EP4 immunoreactivity in conjunctival epithelium from 2 patients with subacute SJS/TEN (Fig. 2D), a patient with severe GVHD (Fig. 2E), and patients with chronic SJS/TEN or OCP [8].

We found that, as in normal human conjunctival epithelium, EP4 is expressed in conjunctival epithelium from patients with chemical eye burn. On the other hand, EP4 immunoreactivity was not detected in conjunctival epithelium from patients with SJS/TEN, OCP, or severe GVHD. We did not detect EP4 protein in cells infiltrating subconjunctival tissues in any of the human conjunctival tissues we examined.

## Discussion

Elsewhere we reported the expression of EP4 in normal human conjunctival epithelium and its down-regulation in conjunctival epithelium from patients with SJS/TEN and OCP [8]. Here we confirmed that in conjunctival tissues from SJS/TEN and OCP patients its mRNA expression was significantly down-regulated, and we also document that EP4 is expressed normally in conjunctival epithelium from patients with severe chemical eye burn which, like SJS/TEN and OCP, is a devastating ocular surface disorder.

On the ocular surface of patients with severe chemical eye burn, conjunctival invasion into the cornea may occur due to the stem cell deficiency of corneal epithelial cells. This results in devastating ocular surface disorders similar to OCP and SJS/TEN. However, in the conjunctiva of patients with severe chemical eye burns, EP4 expression was not down-regulated.

In patients with Mooren's ulcer, an ocular surface inflammatory disease, the expression of EP4 protein varied; in some patients it was down-regulated. In patients in the sub-acute stage of SJS/TEN with ocular surface inflammation, the expression of EP4 protein was remarkably down-regulated.

Kabashima et al. [7] reported that in mice, EP4 deficiency impaired mucosal barrier function and induced the aggregation of lymphocytes and neutrophils in the colon, and that the administration of an EP4-selective agonist to wild-type mice ameliorated severe colitis. In mice treated with an EP4-selective antagonist the recovery from colitis was suppressed, leading them to conclude that EP4 maintains intestinal homeostasis by preserving mucosal integrity and down-regulating the immune response. On the other hand, Yao et al. [9] found that PGE<sub>2</sub> acting on its receptor EP4 on T- and dendritic cells

1  
2  
3  
4  
5 not only facilitated T<sub>H</sub>1 cell differentiation but also amplified interleukin-23-mediated  
6  
7 T<sub>H</sub>17 cell expansion *in vitro*. The administration of an EP4-selective antagonist to mice  
8  
9 with experimental autoimmune encephalomyelitis or contact hypersensitivity decreased  
10  
11 the accumulation of both T<sub>H</sub>1 and T<sub>H</sub>17 cells in regional lymph nodes and suppressed  
12  
13 disease progression. Based on these observations they concluded that PGE<sub>2</sub>-EP4  
14  
15 signaling promotes immune inflammation.  
16  
17

18  
19 In human conjunctival tissues EP4 protein was expressed in epithelial cells but  
20  
21 not in cells infiltrating subconjunctival tissues. We posit that the down-regulation of EP4  
22  
23 in conjunctival epithelium is associated with the ocular surface inflammation seen in  
24  
25 patients with OCP, SJS/TEN, and Mooren's ulcer.  
26

27  
28 On the other hand, elsewhere we reported that although EP3 and EP2 agonists  
29  
30 suppressed the production of CCL5, CXCL11, and CCL20 in response to polyI:C  
31  
32 stimulation, these chemokines were not suppressed by the EP4 agonist in human  
33  
34 conjunctival epithelial cells [5]. Studies are underway in our laboratory to elucidate the  
35  
36 function of EP4 in conjunctival epithelial cells.  
37

38  
39 In summary, EP4 is expressed not only in normal conjunctival epithelium but also  
40  
41 in conjunctival epithelium from patients with chemical eye burns and some patients with  
42  
43 Mooren's ulcer. On the other hand, it is strongly down-regulated in conjunctival  
44  
45 epithelium from patients with OCP and chronic- and subacute SJS/TEN.  
46  
47  
48  
49  
50  
51  
52  
53  
54  
55  
56  
57  
58  
59  
60

## Figure Legends

### Figure 1

The expression of PTGER4 mRNA in conjunctival tissues from patients with SJS/TEN, OCP and the controls.

- A. Representative findings of EP4 immunoreactivity in each group (control, SJS/TEN, OCP).
- B. Expression of PTGER4 mRNA in human conjunctival tissues (\* $p < 0.05$ ).

### Figure 2

Immunohistological analysis of prostaglandin E receptor subtype EP4 in conjunctival epithelium of patients with ocular surface diseases.

- A. Nearly normal conjunctival tissues from patients with conjunctivochalasis.
- B. Conjunctival tissues from patients with chemical eye burn requiring ocular surface reconstruction.
- C. Inflammatory conjunctival tissues from patients with active Mooren's ulcer requiring resection of the inflammatory conjunctiva.
- D. Conjunctival tissues from SJS/TEN patients in the sub-acute stage.
- E. Conjunctival tissues from a patient with severe GVHD.

Each scale bar represents 100  $\mu\text{m}$ .

## References

1. Matsuoka T, Narumiya S: **Prostaglandin receptor signaling in disease.** *ScientificWorldJournal* 2007, **7**:1329-1347.
2. Takayama K, Garcia-Cardena G, Sukhova GK, *et al.*: **Prostaglandin E2 suppresses chemokine production in human macrophages through the EP4 receptor.** *J Biol Chem* 2002, **277**:44147-44154.
3. Xu XJ, Reichner JS, Mastrofrancesco B, *et al.*: **Prostaglandin E2 suppresses lipopolysaccharide-stimulated IFN-beta production.** *J Immunol* 2008, **180**:2125-2131.
4. Shiraishi H, Yoshida H, Saeki K, *et al.*: **Prostaglandin E2 is a major soluble factor produced by stromal cells for preventing inflammatory cytokine production from dendritic cells.** *Int Immunol* 2008, **20**:1219-1229.
5. Ueta M, Matsuoka T, Yokoi N, *et al.*: **Prostaglandin E2 suppresses polyinosine-polycytidylic acid (polyI:C)-stimulated cytokine production via prostaglandin E2 receptor (EP) 2 and 3 in human conjunctival epithelial cells.** *Br J Ophthalmol* 2011, **95**:859-863.
6. Morimoto K, Sugimoto Y, Katsuyama M, *et al.*: **Cellular localization of mRNAs for prostaglandin E receptor subtypes in mouse gastrointestinal tract.** *Am J Physiol* 1997, **272**:G681-687.
7. Kabashima K, Saji T, Murata T, *et al.*: **The prostaglandin receptor EP4 suppresses colitis, mucosal damage and CD4 cell activation in the gut.** *J Clin Invest* 2002, **109**:883-893.
8. Ueta M, Sotozono C, Yokoi N, *et al.*: **Prostaglandin E receptor 4 expression in human conjunctival epithelium and its downregulation in devastating**



1  
2  
3  
4  
5 **ocular surface inflammatory disorders.** *Arch Ophthalmol* 2010,  
6  
7 **128(10):1369-1371.**

- 9  
10 9. Yao C, Sakata D, Esaki Y, *et al*: **Prostaglandin E2-EP4 signaling promotes**  
11 **immune inflammation through Th1 cell differentiation and Th17 cell**  
12 **expansion.** *Nat Med* 2009, **15:633-640.**  
13  
14  
15  
16  
17  
18  
19  
20  
21  
22  
23  
24  
25  
26  
27  
28  
29  
30  
31  
32  
33  
34  
35  
36  
37  
38  
39  
40  
41  
42  
43  
44  
45  
46  
47  
48  
49  
50  
51  
52  
53  
54  
55  
56  
57  
58  
59  
60

## ACKNOWLEDGMENTS

We thank Chikako Endo for technical assistance. This work was supported in part by grants-in-aid for scientific research from the Japanese Ministry of Health, Labour and Welfare, the Japanese Ministry of Education, Culture, Sports, Science and Technology, CREST from JST, a research grant from the Kyoto Foundation for the Promotion of Medical Science, the Intramural Research Fund of Kyoto Prefectural University of Medicine, and an Immunological Research Grant from the Shimizu Foundation.

1  
2  
3  
4  
5 **Expression of prostaglandin E receptor subtype EP4 in conjunctival epithelium of**  
6  
7 **patients with ocular surface disorders: Case-control study**  
8  
9

10  
11 Mayumi Ueta, MD, PhD,<sup>a,b</sup> Chie Sotozono, MD, PhD,<sup>a</sup> Keiko Yamada, MD,<sup>a</sup>

12  
13 Norihiko Yokoi, MD, PhD,<sup>a</sup> Tsutomu Inatomi, MD, PhD,<sup>a</sup> Shigeru Kinoshita, MD, PhD<sup>a</sup>  
14  
15

16  
17  
18 <sup>a</sup>Department of Ophthalmology, Kyoto Prefectural University of Medicine, Kyoto,  
19  
20  
21 Japan

22  
23 <sup>b</sup>Research Center for Inflammation and Regenerative Medicine, Faculty of Life and  
24  
25 Medical Sciences, Doshisha University, Kyoto, Japan  
26  
27

28  
29  
30 **Corresponding author:**

31  
32 Mayumi Ueta, MD, PhD

33  
34 Department of Ophthalmology

35  
36 Kyoto Prefectural University of Medicine

37  
38 465 Kajiicho, Hirokoji

39  
40 Kawaramachi, Kamigyoku

41  
42 Kyoto 602-0841, Japan

43  
44 Telephone: 81-75-251-5578

45  
46 Fax: 81-75-251-5663

47  
48 e-mail: [mueta@koto.kpu-m.ac.jp](mailto:mueta@koto.kpu-m.ac.jp)  
49  
50  
51  
52  
53  
54  
55  
56  
57  
58  
59  
60

**Key words**

Prostaglandin E receptor subtype EP4, human conjunctival epithelium, chemical eye burn, Mooren's ulcer

**Abbreviations**

EP4: Prostaglandin E receptor subtype EP4

SJS: Stevens-Johnson syndrome

TEN: Toxic epidermal necrolysis

GVHD: Graft versus host disease

OCP: Ocular cicatricial pemphigoid

RT-PCR: Reverse transcription polymerase chain reaction

PG: Prostaglandin

- 1) Substantial contributions to conception and design, acquisition of data, or analysis and interpretation of data: Mayumi Ueta, Chie Sotozono, Keiko Yamada, Norihiko Yokoi, Tsutomu Inatomi, Shigeru Kinoshita
- 2) Drafting the article or revising it critically for important intellectual content: Mayumi Ueta, Chie Sotozono, Keiko Yamada, Norihiko Yokoi, Tsutomu Inatomi, Shigeru Kinoshita
- 3) Final approval of the version to be published; Mayumi Ueta, Chie Sotozono, Keiko Yamada, Norihiko Yokoi, Tsutomu Inatomi, Shigeru Kinoshita

No additional data are available.

Competing interest statement: None

## Abstract

**Objectives:** To confirm the down-regulation of PTGER4 mRNA in the conjunctiva of SJS/TEN and OCP patients and to examine the expression of its EP4 protein in the conjunctival epithelium of patients with various ocular surface disorders.

**Design:** Case-control study

**Setting & Participants:** Conjunctival tissues were obtained from patients undergoing surgical reconstruction of the ocular surface due to chemical eye burns, sub-acute and chronic stage SJS/TEN, chronic stage ocular cicatricial pemphigoid (OCP) or severe graft versus host disease (GVHD), and from patients with Mooren's ulcers treated by resection of the inflammatory conjunctiva. We performed quantitative RT-PCR analysis immunohistological analysis of EP4 and quantitative RT-PCR analysis of in conjunctival tissue sections from patients with SJS/TEN and OCP to confirm the down-regulation of EP4 mRNA expression. We also analyzed EP4 immunohistologically in other ocular surface disorders. Conjunctival tissues were obtained from patients undergoing surgical reconstruction of the ocular surface due to chemical eye burns, sub-acute- or chronic SJS/TEN, chronic ocular cicatricial pemphigoid (OCP), severe graft versus host disease (GVHD), and from patients with Mooren's ulcers treated by resection of the inflammatory conjunctiva.

**Primary and secondary outcome measures:** The expression of EP4 mRNA and expression of EP4 protein assessed by quantitative RT-PCR assay and immunohistological methods. and expression of EP4 mRNA.

**Results:** PTGER4 mRNA was significantly lower in conjunctival tissues from SJS and OCP patients than in the control conjunctivochalasis samples. EP4 protein was detected in conjunctival epithelium from patients with chemical eye burn and in control

1  
2  
3  
4  
5 conjunctival epithelium from patients with conjunctivochalasis. Its expression varied in  
6  
7 conjunctival epithelium from patients with Mooren's ulcer. We did not detect EP4  
8  
9 immunoreactivity in conjunctival epithelium from patients with subacute SJS/TEN,  
10  
11 severe GVHD, chronic SJS/TEN, or OCP.  
12  
13

14 **Conclusions:** The strong down-regulation of EP4 expression in conjunctival epithelium  
15  
16 from patients with OCP or SJS/TEN may be attributable to ocular surface inflammation.  
17  
18  
19  
20  
21  
22  
23  
24  
25  
26  
27  
28  
29  
30  
31  
32  
33  
34  
35  
36  
37  
38  
39  
40  
41  
42  
43  
44  
45  
46  
47  
48  
49  
50  
51  
52  
53  
54  
55  
56  
57  
58  
59  
60

## Introduction

The prostanoids PGD<sub>2</sub>, PGE<sub>2</sub>, PGF<sub>2α</sub>, PGI<sub>2</sub>, and TXA<sub>2</sub> are lipid mediators that form in response to various stimuli. They are released extracellularly immediately after their synthesis and they act by binding to a G-protein-coupled rhodopsin-type receptor on the surface of target cells [1]. PGE<sub>2</sub> is produced during inflammatory responses and it suppresses the production of cytokines and chemokines induced by lipopolysaccharide (LPS)-stimulated macrophages [2, 3] and dendritic cells [4]. Elsewhere we reported that PGE<sub>2</sub> modulates the expression of polyI:C-induced pro-inflammatory genes in human conjunctival epithelial cells [5].

There are four PGE receptor subtypes, EP1, EP2, EP3, and EP4. The intestinal epithelium has been reported to express EP4 mRNA [6] and intestinal homeostasis was maintained and the immune response down-regulated by EP4 [7]. We documented that while normal human conjunctival epithelium expressed EP4 protein, it was down-regulated in devastating ocular surface inflammatory disorders such as chronic Stevens-Johnson syndrome (SJS)/toxic epidermal necrolysis (TEN) and chronic ocular cicatricial pemphigoid (OCP) [8]. Here we examined the mRNA expression of EP4 in the conjunctiva of SJS/TEN and OCP patients in the chronic stage to confirm that EP4 is down-regulated in their conjunctiva. We also examined the expression of EP4 protein in the conjunctival epithelium of patients with various ocular surface disorders such as chemical eye burn, Mooren's ulcer, severe graft versus host disease (GVHD), and of patients in the sub-acute stage of SJS/TEN.

## Materials and Methods

### *Human conjunctival tissues*

This study was approved by the Institutional Review Board of Kyoto Prefectural University of Medicine, Kyoto, Japan. All experiments were conducted in accordance with the principles set forth in the Helsinki Declaration.

For quantitative RT-PCR the controls were nearly normal conjunctival tissues obtained at surgery for conjunctivochalasis. We also prepared human conjunctival tissues from samples obtained during surgery to reconstruct the ocular surface in 4 patients in the chronic stage of SJS/TEN and 4 patients in the chronic stage of OCP.

The controls for immunohistochemical analyses were nearly normal conjunctival tissues obtained during surgery for conjunctivochalasis, a disease in which the conjunctiva relaxes due to aging, resulting in a foreign body sensation on the ocular surface. We also prepared human conjunctival tissues from samples obtained during surgery to reconstruct the ocular surface in 3 patients with chemical (alkali) eye burn (2 in the chronic- and one in the sub-acute stage), 2 patients with sub-acute SJS/TEN, one patient with severe GVHD, and from 4 patients with Mooren's ulcer undergoing resection of inflammatory conjunctiva. SJS/TEN, OCP, Mooren's ulcer, chemical burn, and GVHD are all ocular surface inflammatory diseases with persistent inflammation on the ocular surface not only in the acute- but also in the chronic stage.

### *Quantitative RT-PCR*

Total RNA was isolated from conjunctival tissue sections using the RNeasy mini kit (Qiagen) according to the manufacturer's instructions. The RT reaction was with the SuperScript™ preamplification kit (Invitrogen). Quantitative RT-PCR was on an



1  
2  
3  
4  
5 ABI-prism 7700 instrument (Applied Biosystems, Foster City, CA). The probes for  
6  
7 human PTGER4 and human GAPDH were from Applied Biosystems. For cDNA  
8  
9 amplification we performed PCR in a 25- $\mu$ l total volume that contained a 1- $\mu$ l cDNA  
10  
11 template in 2  $\times$  TaqMan universal PCR master mix (Applied Biosystems) at 50°C for 2  
12  
13 min and 95°C for 10 min, followed by 40 cycles at 95°C for 15 sec and 60°C for 1 min.  
14  
15 The results were analyzed with sequence detection software (Applied Biosystems). The  
16  
17 quantification data were normalized to the expression of the housekeeping gene GAPDH.  
18  
19  
20  
21  
22

### 23 *Immunohistochemistry*

24  
25 For EP4 staining we used rabbit polyclonal antibody to EP4 (Cayman Chemical  
26  
27 Co., Ann Arbor, MI). The secondary antibody (Biotin-SP-conjugated AffiniPure F(ab')<sub>2</sub>  
28  
29 fragment donkey anti-rabbit IgG (H+L), 1:500 dilution; Jackson Immuno Research,  
30  
31 Baltimore, MD) was applied for 30 min. The VECTASTAIN ABC reagent (Vector  
32  
33 Laboratories, Inc., Burlingame, CA) was used for increased sensitivity with peroxidase  
34  
35 substrate solution (DAB substrate kit; Vector) as a chromogenic substrate.  
36  
37  
38  
39  
40

### 41 *Quantitative RT-PCR*

42  
43 ~~Total RNA was isolated from conjunctival tissue sections using the RNeasy mini~~  
44  
45 ~~kit (Qiagen) according to the manufacturer's instructions. The RT reaction was with the~~  
46  
47 ~~SuperScript<sup>TM</sup> preamplification kit (Invitrogen). Quantitative RT-PCR was on an~~  
48  
49 ~~ABI-prism 7700 instrument (Applied Biosystems, Foster City, CA). The probes for~~  
50  
51 ~~human PTGER4 and human GAPDH were from Applied Biosystems. For cDNA~~  
52  
53 ~~amplification we performed PCR in a 25- $\mu$ l total volume that contained a 1- $\mu$ l cDNA~~  
54  
55 ~~template in 2  $\times$  TaqMan universal PCR master mix (Applied Biosystems) at 50°C for 2~~  
56  
57  
58  
59  
60

1  
2  
3  
4  
5  
6  
7  
8  
9  
10  
11  
12  
13  
14  
15  
16  
17  
18  
19  
20  
21  
22  
23  
24  
25  
26  
27  
28  
29  
30  
31  
32  
33  
34  
35  
36  
37  
38  
39  
40  
41  
42  
43  
44  
45  
46  
47  
48  
49  
50  
51  
52  
53  
54  
55  
56  
57  
58  
59  
60

min and 95°C for 10 min, followed by 40 cycles at 95°C for 15 sec and 60°C for 1 min.  
The results were analyzed with sequence detection software (Applied Biosystems). The  
quantification data were normalized to the expression of the housekeeping gene GAPDH.

For peer review only

## Results

To confirm the down-regulation of EP4 in the ocular surface of SJS and OCP patients we examined the expression of PTGER4 mRNA in control conjunctival tissues from 6 conjunctival chalasis patients and in conjunctival tissues from 4 SJS/TEN- and 4 OCP patients. Representative findings of EP4 immunoreactivity in each of these groups are shown in Fig. 1A. Although EP4 protein was detected in the control tissues, conjunctival epithelium from SJS- and OCP patients did not manifest EP4 immunoreactivity. PTGER4 mRNA was significantly lower in conjunctival tissues from SJS and OCP patients than in the control conjunctivochalasis samples (Fig. 1B).

EP4 protein was detected in nearly normal conjunctival epithelium from patients with conjunctivochalasis (Fig. 2A) and in conjunctival tissues from 3 patients with chemical eye burn (Fig. 2B). Its expression varied in conjunctival epithelium from 4 patients with Mooren's ulcer (Fig. 2C): in one patient it was similar to the control, in 2 it was slightly lower than in the control, and in the remaining patient it was not detected. There was no EP4 immunoreactivity in conjunctival epithelium from 2 patients with subacute SJS/TEN (Fig. 2D), a patient with severe GVHD (Fig. 2E), and patients with chronic SJS/TEN or OCP [8].

We found that, as in normal human conjunctival epithelium, EP4 is expressed in conjunctival epithelium from patients with chemical eye burn. On the other hand, EP4 immunoreactivity was not detected ~~it was strongly down-regulated~~ in conjunctival epithelium from patients with SJS/TEN, OCP, or severe GVHD. We did not detect EP4 protein in cells infiltrating subconjunctival tissues in any of the human conjunctival tissues we examined.

~~To confirm the down-regulation of EP4 in the ocular surface of SJS and OCP~~

1  
2  
3  
4  
5 patients we examined the expression of PTGER4 mRNA in control conjunctival tissues  
6  
7 from 6 conjunctival chalasis patients and in conjunctival tissues from 4 SJS/TEN and 4  
8  
9 OCP patients. Representative findings of EP4 immunoreactivity in each of these groups  
10  
11 are shown in Fig. 2A. Although EP4 protein was detected in tissues from patients with  
12  
13 conjunctivochalasis (controls), conjunctival epithelium from SJS and OCP patients did  
14  
15 not manifest EP4 immunoreactivity. PTGER4 mRNA was significantly lower in  
16  
17 conjunctival tissues from SJS and OCP patients than in the control conjunctivochalasis  
18  
19 samples (Fig. 2B).  
20  
21  
22  
23  
24  
25  
26  
27  
28  
29  
30  
31  
32  
33  
34  
35  
36  
37  
38  
39  
40  
41  
42  
43  
44  
45  
46  
47  
48  
49  
50  
51  
52  
53  
54  
55  
56  
57  
58  
59  
60

## Discussion

Elsewhere we reported the expression of EP4 in normal human conjunctival epithelium and its down-regulation in conjunctival epithelium from patients with SJS/TEN and OCP [8]. Here **we confirmed that in conjunctival tissues from SJS/TEN and OCP patients its mRNA expression was significantly down-regulated, and we also** document that EP4 is expressed normally in conjunctival epithelium from patients with severe chemical eye burn which, like SJS/TEN and OCP, is a devastating ocular surface disorder. ~~We also confirmed that in conjunctival tissues from SJS/TEN and OCP patients its mRNA expression was significantly down-regulated.~~

On the ocular surface of patients with severe chemical eye burn, conjunctival invasion into the cornea may occur due to the stem cell deficiency of corneal epithelial cells. This results in devastating ocular surface disorders similar to OCP and SJS/TEN. However, in the conjunctiva of patients with severe chemical eye burns, EP4 expression was not down-regulated.

In patients with Mooren's ulcer, an ocular surface inflammatory disease, the expression of EP4 protein varied; in some patients it was down-regulated. In patients in the sub-acute stage of SJS/TEN with ocular surface inflammation, the expression of EP4 protein was remarkably down-regulated.

Kabashima et al. [7] reported that in mice, EP4 deficiency impaired mucosal barrier function and induced the aggregation of lymphocytes and neutrophils in the colon, and that the administration of an EP4-selective agonist to wild-type mice ameliorated severe colitis. In mice treated with an EP4-selective antagonist the recovery from colitis was suppressed, leading them to conclude that EP4 maintains intestinal homeostasis by preserving mucosal integrity and down-regulating the immune response. On the other

1  
2  
3  
4  
5 hand, Yao et al. [9] found that PGE<sub>2</sub> acting on its receptor EP4 on T- and dendritic cells  
6  
7 not only facilitated T<sub>H</sub>1 cell differentiation but also amplified interleukin-23-mediated  
8  
9 T<sub>H</sub>17 cell expansion *in vitro*. The administration of an EP4-selective antagonist to mice  
10  
11 with experimental autoimmune encephalomyelitis or contact hypersensitivity decreased  
12  
13 the accumulation of both T<sub>H</sub>1 and T<sub>H</sub>17 cells in regional lymph nodes and suppressed  
14  
15 disease progression. Based on these observations they concluded that PGE<sub>2</sub>-EP4  
16  
17 signaling promotes immune inflammation.  
18  
19

20  
21 In human conjunctival tissues EP4 protein was expressed in epithelial cells but  
22  
23 not in cells infiltrating subconjunctival tissues. We posit that the down-regulation of EP4  
24  
25 in conjunctival epithelium is associated with the ocular surface inflammation seen in  
26  
27 patients with OCP, SJS/TEN, and Mooren's ulcer—because as in the acute or sub-acute  
28  
29 stage, patients in the chronic phase of OCP and SJS/TEN manifested mucosal  
30  
31 inflammation on the ocular surface.  
32  
33

34  
35 On the other hand, elsewhere we reported that although EP3 and EP2 agonists  
36  
37 suppressed the production of CCL5, CXCL11, and CCL20 in response to polyI:C  
38  
39 stimulation, these chemokines were not suppressed by the EP4 agonist in human  
40  
41 conjunctival epithelial cells [5]. Studies are underway in our laboratory to elucidate the  
42  
43 function of EP4 in conjunctival epithelial cells.  
44

45  
46 In summary, EP4 is expressed not only in normal conjunctival epithelium but also  
47  
48 in conjunctival epithelium from patients with chemical eye burns and some patients with  
49  
50 Mooren's ulcer. On the other hand, it is strongly down-regulated in conjunctival  
51  
52 epithelium from patients with OCP and chronic- and subacute SJS/TEN.  
53  
54  
55  
56  
57  
58  
59  
60

## Figure Legends

### Figure 1

Immunohistological analysis of prostaglandin E receptor subtype EP4 in conjunctival epithelium of patients with ocular surface diseases.

A. — Nearly normal conjunctival tissues from patients with conjunctivochalasis.

B. — Conjunctival tissues from patients with chemical eye burn requiring ocular surface reconstruction.

C. — Inflammatory conjunctival tissues from patients with active Mooren's ulcer requiring resection of the inflammatory conjunctiva.

D. — Conjunctival tissues from SJS/TEN patients in the sub-acute stage.

E. — Conjunctival tissues from a patient with severe GVHD.

Each scale bar represents 100  $\mu\text{m}$ .

### Figure 2

#### Figure 1

The expression of PTGER4 mRNA in conjunctival tissues from patients with SJS/TEN, OCP and the controls.

A. Representative findings of EP4 immunoreactivity in each group (control, SJS/TEN, OCP).

B. Expression of PTGER4 mRNA in human conjunctival tissues (\* $p < 0.05$ ).

### Figure 1

#### Figure 2

1  
2  
3  
4  
5 Immunohistological analysis of prostaglandin E receptor subtype EP4 in conjunctival  
6  
7 epithelium of patients with ocular surface diseases.

8  
9 F. Nearly normal conjunctival tissues from patients with conjunctivochalasis.

10  
11 G. Conjunctival tissues from patients with chemical eye burn requiring ocular  
12  
13 surface reconstruction.

14  
15 H. Inflammatory conjunctival tissues from patients with active Mooren's ulcer  
16  
17 requiring resection of the inflammatory conjunctiva.

18  
19 I. Conjunctival tissues from SJS/TEN patients in the sub-acute stage.

20  
21 J. Conjunctival tissues from a patient with severe GVHD.

22  
23 Each scale bar represents 100  $\mu\text{m}$ .



## References

1. Matsuoka T, Narumiya S: **Prostaglandin receptor signaling in disease.** *ScientificWorldJournal* 2007, **7**:1329-1347.
2. Takayama K, Garcia-Cardena G, Sukhova GK, *et al.*: **Prostaglandin E2 suppresses chemokine production in human macrophages through the EP4 receptor.** *J Biol Chem* 2002, **277**:44147-44154.
3. Xu XJ, Reichner JS, Mastrofrancesco B, *et al.*: **Prostaglandin E2 suppresses lipopolysaccharide-stimulated IFN-beta production.** *J Immunol* 2008, **180**:2125-2131.
4. Shiraishi H, Yoshida H, Saeki K, *et al.*: **Prostaglandin E2 is a major soluble factor produced by stromal cells for preventing inflammatory cytokine production from dendritic cells.** *Int Immunol* 2008, **20**:1219-1229.
5. Ueta M, Matsuoka T, Yokoi N, *et al.*: **Prostaglandin E2 suppresses polyinosine-polycytidylic acid (polyI:C)-stimulated cytokine production via prostaglandin E2 receptor (EP) 2 and 3 in human conjunctival epithelial cells.** *Br J Ophthalmol* 2011, **95**:859-863.
6. Morimoto K, Sugimoto Y, Katsuyama M, *et al.*: **Cellular localization of mRNAs for prostaglandin E receptor subtypes in mouse gastrointestinal tract.** *Am J Physiol* 1997, **272**:G681-687.
7. Kabashima K, Saji T, Murata T, *et al.*: **The prostaglandin receptor EP4 suppresses colitis, mucosal damage and CD4 cell activation in the gut.** *J Clin Invest* 2002, **109**:883-893.
8. Ueta M, Sotozono C, Yokoi N, *et al.*: **Prostaglandin E receptor 4 expression in human conjunctival epithelium and its downregulation in devastating**

1  
2  
3  
4  
5 **ocular surface inflammatory disorders.** *Arch Ophthalmol* 2010,  
6  
7 **128(10):1369-1371.**

- 8  
9  
10 9. Yao C, Sakata D, Esaki Y, *et al*: **Prostaglandin E2-EP4 signaling promotes**  
11 **immune inflammation through Th1 cell differentiation and Th17 cell**  
12 **expansion.** *Nat Med* 2009, **15:633-640.**  
13  
14  
15  
16  
17  
18  
19  
20  
21  
22  
23  
24  
25  
26  
27  
28  
29  
30  
31  
32  
33  
34  
35  
36  
37  
38  
39  
40  
41  
42  
43  
44  
45  
46  
47  
48  
49  
50  
51  
52  
53  
54  
55  
56  
57  
58  
59  
60

## ACKNOWLEDGMENTS

We thank Chikako Endo for technical assistance. This work was supported in part by grants-in-aid for scientific research from the Japanese Ministry of Health, Labour and Welfare, the Japanese Ministry of Education, Culture, Sports, Science and Technology, CREST from JST, a research grant from the Kyoto Foundation for the Promotion of Medical Science, the Intramural Research Fund of Kyoto Prefectural University of Medicine, and an Immunological Research Grant from the Shimizu Foundation.

1  
2  
3  
4  
5  
6  
7  
8  
9  
10  
11  
12  
13  
14  
15  
16  
17  
18  
19  
20  
21  
22  
23  
24  
25  
26  
27  
28  
29  
30  
31  
32  
33  
34  
35  
36  
37  
38  
39  
40  
41  
42  
43  
44  
45  
46  
47  
48  
49  
50  
51  
52  
53  
54  
55  
56  
57  
58  
59  
60

Figure 1

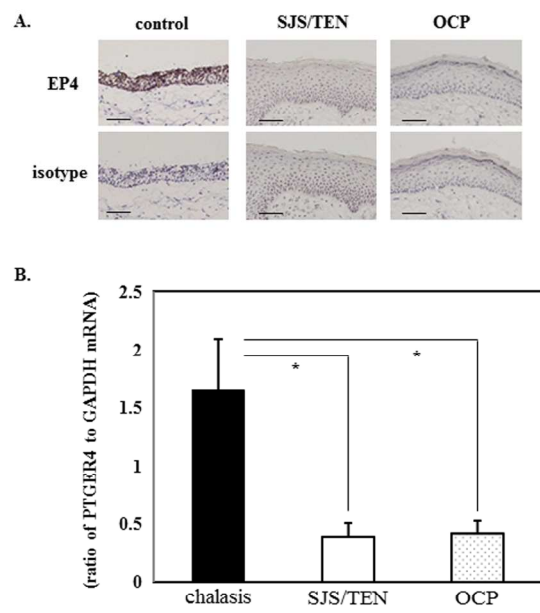

190x275mm (300 x 300 DPI)

Figure 2

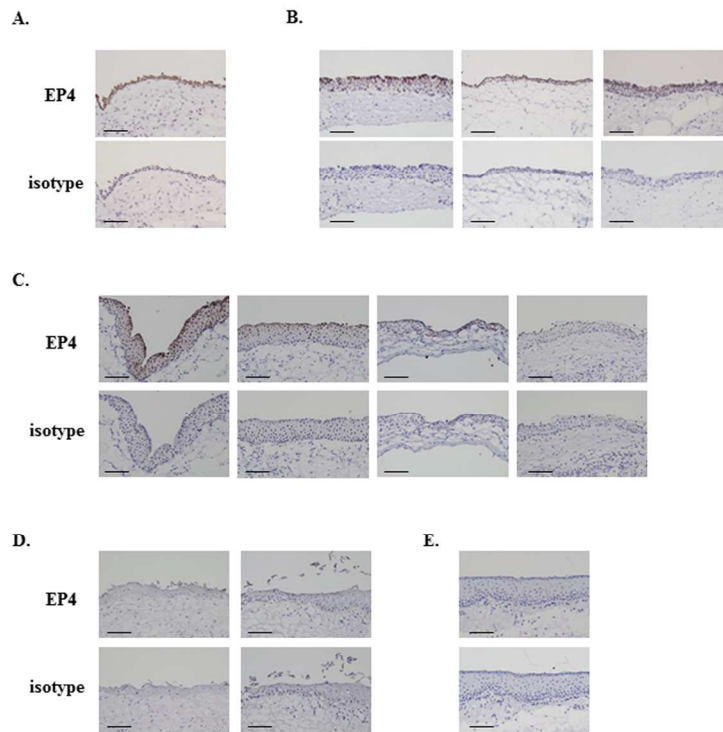

190x275mm (300 x 300 DPI)



**Expression of prostaglandin E receptor subtype EP4 in conjunctival epithelium of patients with ocular surface disorders**

|                                 |                                                                                                                                                                                                                                                                                                                                                                                                                                                                                                                               |
|---------------------------------|-------------------------------------------------------------------------------------------------------------------------------------------------------------------------------------------------------------------------------------------------------------------------------------------------------------------------------------------------------------------------------------------------------------------------------------------------------------------------------------------------------------------------------|
| Journal:                        | <i>BMJ Open</i>                                                                                                                                                                                                                                                                                                                                                                                                                                                                                                               |
| Manuscript ID:                  | bmjopen-2012-001330.R2                                                                                                                                                                                                                                                                                                                                                                                                                                                                                                        |
| Article Type:                   | Research                                                                                                                                                                                                                                                                                                                                                                                                                                                                                                                      |
| Date Submitted by the Author:   | 28-Jul-2012                                                                                                                                                                                                                                                                                                                                                                                                                                                                                                                   |
| Complete List of Authors:       | Ueta, Mayumi; Kyoto Prefectural University of Medicine, Department of Ophthalmology<br>Sotozono, Chie; Kyoto Prefectural Univ of Med, Ophthalmology<br>Yamada, Keiko; Kyoto Prefectural University of Medicine, Department of Ophthalmology<br>Yokoi, Norihiko; Kyoto Prefectural University of Medicine, Department of Ophthalmology<br>Inatomi, Tsutomu; Kyoto Prefectural University of Medicine, Department of Ophthalmology<br>Kinoshita, Shigeru; Kyoto Prefectural University of Medicine, Department of Ophthalmology |
| <b>Primary Subject Heading</b>: | Ophthalmology                                                                                                                                                                                                                                                                                                                                                                                                                                                                                                                 |
| Secondary Subject Heading:      | Genetics and genomics                                                                                                                                                                                                                                                                                                                                                                                                                                                                                                         |
| Keywords:                       | OPHTHALMOLOGY, Corneal and external diseases < OPHTHALMOLOGY, Histology < BASIC SCIENCES                                                                                                                                                                                                                                                                                                                                                                                                                                      |
|                                 |                                                                                                                                                                                                                                                                                                                                                                                                                                                                                                                               |

SCHOLARONE™  
Manuscripts

STROBE 2007 (v4) Statement—Checklist of items that should be included in reports of *case-control studies*

| Section/Topic                | Item # | Recommendation                                                                                                                                                                       | Reported on page # |
|------------------------------|--------|--------------------------------------------------------------------------------------------------------------------------------------------------------------------------------------|--------------------|
| Title and abstract           | 1      | (a) Indicate the study's design with a commonly used term in the title or the abstract                                                                                               | 1                  |
|                              |        | (b) Provide in the abstract an informative and balanced summary of what was done and what was found                                                                                  | 3                  |
| <b>Introduction</b>          |        |                                                                                                                                                                                      |                    |
| Background/rationale         | 2      | Explain the scientific background and rationale for the investigation being reported                                                                                                 | 4                  |
| Objectives                   | 3      | State specific objectives, including any prespecified hypotheses                                                                                                                     | 4                  |
| <b>Methods</b>               |        |                                                                                                                                                                                      |                    |
| Study design                 | 4      | Present key elements of study design early in the paper                                                                                                                              | 5                  |
| Setting                      | 5      | Describe the setting, locations, and relevant dates, including periods of recruitment, exposure, follow-up, and data collection                                                      | 5                  |
| Participants                 | 6      | (a) Give the eligibility criteria, and the sources and methods of case ascertainment and control selection. Give the rationale for the choice of cases and controls                  | 5                  |
|                              |        | (b) For matched studies, give matching criteria and the number of controls per case                                                                                                  |                    |
| Variables                    | 7      | Clearly define all outcomes, exposures, predictors, potential confounders, and effect modifiers. Give diagnostic criteria, if applicable                                             | 5                  |
| Data sources/<br>measurement | 8*     | For each variable of interest, give sources of data and details of methods of assessment (measurement). Describe comparability of assessment methods if there is more than one group | 5                  |
| Bias                         | 9      | Describe any efforts to address potential sources of bias                                                                                                                            |                    |
| Study size                   | 10     | Explain how the study size was arrived at                                                                                                                                            |                    |
| Quantitative variables       | 11     | Explain how quantitative variables were handled in the analyses. If applicable, describe which groupings were chosen and why                                                         | 5                  |
| Statistical methods          | 12     | (a) Describe all statistical methods, including those used to control for confounding                                                                                                | 6                  |
|                              |        | (b) Describe any methods used to examine subgroups and interactions                                                                                                                  |                    |
|                              |        | (c) Explain how missing data were addressed                                                                                                                                          |                    |
|                              |        | (d) If applicable, explain how matching of cases and controls was addressed                                                                                                          |                    |
|                              |        | (e) Describe any sensitivity analyses                                                                                                                                                |                    |
| <b>Results</b>               |        |                                                                                                                                                                                      |                    |

|                          |     |                                                                                                                                                                                                                                                                                                                                                                                                               |     |
|--------------------------|-----|---------------------------------------------------------------------------------------------------------------------------------------------------------------------------------------------------------------------------------------------------------------------------------------------------------------------------------------------------------------------------------------------------------------|-----|
| Participants             | 13* | (a) Report numbers of individuals at each stage of study—eg numbers potentially eligible, examined for eligibility, confirmed eligible, included in the study, completing follow-up, and analysed<br>(b) Give reasons for non-participation at each stage<br>(c) Consider use of a flow diagram                                                                                                               |     |
| Descriptive data         | 14* | (a) Give characteristics of study participants (eg demographic, clinical, social) and information on exposures and potential confounders<br>(b) Indicate number of participants with missing data for each variable of interest                                                                                                                                                                               | 7   |
| Outcome data             | 15* | Report numbers in each exposure category, or summary measures of exposure                                                                                                                                                                                                                                                                                                                                     |     |
| Main results             | 16  | (a) Give unadjusted estimates and, if applicable, confounder-adjusted estimates and their precision (eg, 95% confidence interval). Make clear which confounders were adjusted for and why they were included<br>(b) Report category boundaries when continuous variables were categorized<br>(c) If relevant, consider translating estimates of relative risk into absolute risk for a meaningful time period |     |
| Other analyses           | 17  | Report other analyses done—eg analyses of subgroups and interactions, and sensitivity analyses                                                                                                                                                                                                                                                                                                                |     |
| <b>Discussion</b>        |     |                                                                                                                                                                                                                                                                                                                                                                                                               |     |
| Key results              | 18  | Summarise key results with reference to study objectives                                                                                                                                                                                                                                                                                                                                                      | 7   |
| Limitations              | 19  | Discuss limitations of the study, taking into account sources of potential bias or imprecision.<br>Discuss both direction and magnitude of any potential bias                                                                                                                                                                                                                                                 |     |
| Interpretation           | 20  | Give a cautious overall interpretation of results considering objectives, limitations, multiplicity of analyses, results from similar studies, and other relevant evidence                                                                                                                                                                                                                                    |     |
| Generalisability         | 21  | Discuss the generalisability (external validity) of the study results                                                                                                                                                                                                                                                                                                                                         | 8   |
| <b>Other information</b> |     |                                                                                                                                                                                                                                                                                                                                                                                                               |     |
| Funding                  | 22  | Give the source of funding and the role of the funders for the present study and, if applicable, for the original study on which the present article is based                                                                                                                                                                                                                                                 | 1 3 |

\*Give information separately for cases and controls in case-control studies and, if applicable, for exposed and unexposed groups in cohort and cross-sectional studies.

**Note:** An Explanation and Elaboration article discusses each checklist item and gives methodological background and published examples of transparent reporting. The STROBE checklist is best used in conjunction with this article (freely available on the Web sites of PLoS Medicine at <http://www.plosmedicine.org/>, Annals of Internal Medicine at <http://www.annals.org/>, and Epidemiology at <http://www.epidem.com/>). Information on the STROBE Initiative is available at [www.strobe-statement.org](http://www.strobe-statement.org).



1  
2  
3  
4  
5 **Expression of prostaglandin E receptor subtype EP4 in conjunctival epithelium of**  
6  
7 **patients with ocular surface disorders: Case-control study**  
8  
9

10  
11 Mayumi Ueta, MD, PhD,<sup>a,b</sup> Chie Sotozono, MD, PhD,<sup>a</sup> Keiko Yamada, MD,<sup>a</sup>

12  
13 Norihiko Yokoi, MD, PhD,<sup>a</sup> Tsutomu Inatomi, MD, PhD,<sup>a</sup> Shigeru Kinoshita, MD, PhD<sup>a</sup>  
14  
15

16  
17  
18 <sup>a</sup>Department of Ophthalmology, Kyoto Prefectural University of Medicine, Kyoto,  
19  
20  
21 Japan

22  
23 <sup>b</sup>Research Center for Inflammation and Regenerative Medicine, Faculty of Life and  
24  
25 Medical Sciences, Doshisha University, Kyoto, Japan  
26  
27

28  
29  
30 **Corresponding author:**

31  
32 Mayumi Ueta, MD, PhD

33  
34 Department of Ophthalmology

35  
36 Kyoto Prefectural University of Medicine

37  
38 465 Kajiicho, Hirokoji

39  
40 Kawaramachi, Kamigyoku

41  
42 Kyoto 602-0841, Japan

43  
44 Telephone: 81-75-251-5578

45  
46 Fax: 81-75-251-5663

47  
48 e-mail: mueta@koto.kpu-m.ac.jp  
49  
50  
51  
52  
53  
54  
55  
56  
57  
58  
59  
60

**Key words**

Prostaglandin E receptor subtype EP4, human conjunctival epithelium, chemical eye burn, Mooren's ulcer

**Abbreviations**

EP4: Prostaglandin E receptor subtype EP4

SJS: Stevens-Johnson syndrome

TEN: Toxic epidermal necrolysis

GVHD: Graft versus host disease

OCP: Ocular cicatricial pemphigoid

RT-PCR: Reverse transcription polymerase chain reaction

PG: Prostaglandin

- 1) Substantial contributions to conception and design, acquisition of data, or analysis and interpretation of data: Mayumi Ueta, Chie Sotozono, Keiko Yamada, Norihiko Yokoi, Tsutomu Inatomi, Shigeru Kinoshita
- 2) Drafting the article or revising it critically for important intellectual content: Mayumi Ueta, Chie Sotozono, Keiko Yamada, Norihiko Yokoi, Tsutomu Inatomi, Shigeru Kinoshita
- 3) Final approval of the version to be published; Mayumi Ueta, Chie Sotozono, Keiko Yamada, Norihiko Yokoi, Tsutomu Inatomi, Shigeru Kinoshita

No additional data are available.

Competing interest statement: None

**Abstract**

**Objectives:** To confirm the down-regulation of PTGER4 mRNA in the conjunctiva of SJS/TEN and OCP patients and to examine the expression of its EP4 protein in the conjunctival epithelium of patients with various ocular surface disorders.

**Design:** Case-control study

**Setting & Participants:** We performed quantitative RT-PCR analysis of EP4 in conjunctival tissue sections from patients with SJS/TEN and OCP to confirm the down-regulation of EP4 mRNA expression. We also analyzed EP4 immunohistologically in other ocular surface disorders. Conjunctival tissues were obtained from patients undergoing surgical reconstruction of the ocular surface due to chemical eye burns, sub-acute- or chronic SJS/TEN, chronic ocular cicatricial pemphigoid (OCP), severe graft versus host disease (GVHD), and from patients with Mooren's ulcers treated by resection of the inflammatory conjunctiva.

**Primary and secondary outcome measures:** The expression of EP4 mRNA and EP4 protein assessed by quantitative RT-PCR assay and immunohistological methods.

**Results:** PTGER4 mRNA was significantly lower in conjunctival tissues from SJS and OCP patients than in the control conjunctivochalasis samples. EP4 protein was detected in conjunctival epithelium from patients with chemical eye burn and in control conjunctival epithelium from patients with conjunctivochalasis. Its expression varied in conjunctival epithelium from patients with Mooren's ulcer. We did not detect EP4 immunoreactivity in conjunctival epithelium from patients with subacute SJS/TEN, severe GVHD, chronic SJS/TEN, or OCP.

**Conclusions:** The strong down-regulation of EP4 expression in conjunctival epithelium from patients with OCP or SJS/TEN may be attributable to ocular surface inflammation.

## Introduction

The prostanoids PGD<sub>2</sub>, PGE<sub>2</sub>, PGF<sub>2α</sub>, PGI<sub>2</sub>, and TXA<sub>2</sub> are lipid mediators that form in response to various stimuli. They are released extracellularly immediately after their synthesis and they act by binding to a G-protein-coupled rhodopsin-type receptor on the surface of target cells [1]. PGE<sub>2</sub> is produced during inflammatory responses and it suppresses the production of cytokines and chemokines induced by lipopolysaccharide (LPS)-stimulated macrophages [2, 3] and dendritic cells [4]. Elsewhere we reported that PGE<sub>2</sub> modulates the expression of polyI:C-induced pro-inflammatory genes in human conjunctival epithelial cells [5].

There are four PGE receptor subtypes, EP1, EP2, EP3, and EP4. The intestinal epithelium has been reported to express EP4 mRNA [6] and intestinal homeostasis was maintained and the immune response down-regulated by EP4 [7]. The ocular surface is also one of the mucosa that is in contact with commensal bacteria like the intestine. Therefore, we focused the expression of EP4 in human conjunctival epithelium and the difference of its expression between various ocular surface diseases.

We documented that while normal human conjunctival epithelium expressed EP4 protein, it was down-regulated in devastating ocular surface inflammatory disorders such as chronic Stevens-Johnson syndrome (SJS)/toxic epidermal necrolysis (TEN) and chronic ocular cicatricial pemphigoid (OCP) [8]. Here we examined the mRNA expression of EP4 in the conjunctiva of SJS/TEN and OCP patients in the chronic stage to confirm that EP4 is down-regulated in their conjunctiva. We also examined the expression of EP4 protein in the conjunctival epithelium of patients with various ocular surface disorders such as chemical eye burn, Mooren's ulcer, severe graft versus host disease (GVHD), and of patients in the sub-acute stage of SJS/TEN.

## Materials and Methods

### *Human conjunctival tissues*

This study was approved by the Institutional Review Board of Kyoto Prefectural University of Medicine, Kyoto, Japan. All experiments were conducted in accordance with the principles set forth in the Helsinki Declaration.

For quantitative RT-PCR the controls were nearly normal conjunctival tissues obtained at surgery for conjunctivochalasis. We also prepared human conjunctival tissues from samples obtained during surgery to reconstruct the ocular surface in 4 patients in the chronic stage of SJS/TEN and 4 patients in the chronic stage of OCP.

The controls for immunohistochemical analyses were nearly normal conjunctival tissues obtained during surgery for conjunctivochalasis, a disease in which the conjunctiva relaxes due to aging, resulting in a foreign body sensation on the ocular surface. We also prepared human conjunctival tissues from samples obtained during surgery to reconstruct the ocular surface in 3 patients with chemical (alkali) eye burn (2 in the chronic- and one in the sub-acute stage), 2 patients with sub-acute SJS/TEN, one patient with severe GVHD, and from 4 patients with Mooren's ulcer undergoing resection of inflammatory conjunctiva. SJS/TEN, OCP, Mooren's ulcer, chemical burn, and GVHD are all ocular surface inflammatory diseases with persistent inflammation on the ocular surface not only in the acute- but also in the chronic stage.

### *Quantitative RT-PCR*

Total RNA was isolated from conjunctival tissue sections using the RNeasy mini kit (Qiagen) according to the manufacturer's instructions. The RT reaction was with the SuperScript™ preamplification kit (Invitrogen). Quantitative RT-PCR was on an

1  
2  
3  
4  
5 ABI-prism 7700 instrument (Applied Biosystems, Foster City, CA). The probes for  
6  
7 human PTGER4 and human GAPDH were from Applied Biosystems. For cDNA  
8  
9 amplification we performed PCR in a 25- $\mu$ l total volume that contained a 1- $\mu$ l cDNA  
10  
11 template in 2  $\times$  TaqMan universal PCR master mix (Applied Biosystems) at 50°C for 2  
12  
13 min and 95°C for 10 min, followed by 40 cycles at 95°C for 15 sec and 60°C for 1 min.  
14  
15 The results were analyzed with sequence detection software (Applied Biosystems). The  
16  
17 quantification data were normalized to the expression of the housekeeping gene GAPDH.  
18  
19  
20  
21  
22

### 23 *Immunohistochemistry*

24  
25 For EP4 staining we used rabbit polyclonal antibody to EP4 (Cayman Chemical  
26  
27 Co., Ann Arbor, MI). The secondary antibody (Biotin-SP-conjugated AffiniPure F(ab')<sub>2</sub>  
28  
29 fragment donkey anti-rabbit IgG (H+L), 1:500 dilution; Jackson Immuno Research,  
30  
31 Baltimore, MD) was applied for 30 min. The VECTASTAIN ABC reagent (Vector  
32  
33 Laboratories, Inc., Burlingame, CA) was used for increased sensitivity with peroxidase  
34  
35 substrate solution (DAB substrate kit; Vector) as a chromogenic substrate.  
36  
37  
38  
39  
40

### 41 *Data analysis*

42  
43 Data were expressed as the mean  $\pm$  SEM and evaluated by the Student's t-test using the  
44  
45 Microsoft Excel software program.  
46  
47  
48  
49  
50  
51  
52  
53  
54  
55  
56  
57  
58  
59  
60

## Results

We previously documented that EP4 protein expression was down-regulated in conjunctival epithelium of devastating ocular surface inflammatory disorders such as chronic SJS/TEN and chronic OCP [8]. In this study, to confirm the down-regulation of EP4 in the ocular surface of SJS/TEN and OCP patients we examined the expression of PTGER4 mRNA in control conjunctival tissues from 6 conjunctival chalasis patients and in conjunctival tissues from 4 SJS/TEN- and 4 OCP patients. Representative findings of EP4 immunoreactivity in each of these groups are shown in Fig. 1A. Although EP4 protein was detected in the control tissues, conjunctival epithelium from SJS- and OCP patients did not manifest EP4 immunoreactivity. PTGER4 mRNA was significantly lower in conjunctival tissues from SJS/TEN and OCP patients than in the control conjunctivochalasis samples (Fig. 1B).

Moreover, we examined the expression of EP4 protein in the conjunctival epithelium of patients with other various ocular surface disorders. EP4 protein was detected in nearly normal conjunctival epithelium from patients with conjunctivochalasis (Fig. 2A) and in conjunctival tissues from 3 patients with chemical eye burn (Fig. 2B). Its expression varied in conjunctival epithelium from 4 patients with Mooren's ulcer (Fig. 2C): in one patient it was similar to the control, in 2 it was slightly lower than in the control, and in the remaining patient it was not detected. There was no EP4 immunoreactivity in conjunctival epithelium from 2 patients with subacute SJS/TEN (Fig. 2D), a patient with severe GVHD (Fig. 2E) as same as patients with chronic SJS/TEN or OCP [8].

We found that, as in normal human conjunctival epithelium, EP4 is expressed in conjunctival epithelium from patients with chemical eye burn. On the other hand, EP4

1  
2  
3  
4  
5 immunoreactivity was not detected in conjunctival epithelium from patients with  
6  
7 SJS/TEN, OCP, or severe GVHD. We did not detect EP4 protein in cells infiltrating  
8  
9 subconjunctival tissues in any of the human conjunctival tissues we examined.  
10  
11  
12  
13  
14  
15  
16  
17  
18  
19  
20  
21  
22  
23  
24  
25  
26  
27  
28  
29  
30  
31  
32  
33  
34  
35  
36  
37  
38  
39  
40  
41  
42  
43  
44  
45  
46  
47  
48  
49  
50  
51  
52  
53  
54  
55  
56  
57  
58  
59  
60

For peer review only



## Discussion

Elsewhere we reported the expression of EP4 in normal human conjunctival epithelium and its down-regulation in conjunctival epithelium from patients with SJS/TEN and OCP [8]. Here we confirmed that in conjunctival tissues from SJS/TEN and OCP patients its mRNA expression was significantly down-regulated, and we also document that EP4 is expressed normally in conjunctival epithelium from patients with severe chemical eye burn which, like SJS/TEN and OCP, is a devastating ocular surface disorder.

On the ocular surface of patients with severe chemical eye burn, conjunctival invasion into the cornea may occur due to the stem cell deficiency of corneal epithelial cells. This results in devastating ocular surface disorders similar to OCP and SJS/TEN. However, in the conjunctiva of patients with severe chemical eye burns, EP4 expression was not down-regulated.

In patients with Mooren's ulcer, an ocular surface inflammatory disease, the expression of EP4 protein varied; in some patients it was down-regulated. In patients in the sub-acute stage of SJS/TEN with ocular surface inflammation, the expression of EP4 protein was remarkably down-regulated.

Our results suggest that it is possible that EP4 in conjunctival epithelium might contribute the ocular surface homeostasis, while the EP4 may not necessarily be down-regulated in all devastating ocular surface disorders.

Kabashima et al. [7] reported that in mice, EP4 deficiency impaired mucosal barrier function and induced the aggregation of lymphocytes and neutrophils in the colon, and that the administration of an EP4-selective agonist to wild-type mice ameliorated severe colitis. In mice treated with an EP4-selective antagonist the recovery from colitis

1  
2  
3  
4  
5 was suppressed, leading them to conclude that EP4 maintains intestinal homeostasis by  
6  
7 preserving mucosal integrity and down-regulating the immune response. On the other  
8  
9 hand, Yao et al. [9] found that PGE<sub>2</sub> acting on its receptor EP4 on T- and dendritic cells  
10  
11 not only facilitated T<sub>H</sub>1 cell differentiation but also amplified interleukin-23-mediated  
12  
13 T<sub>H</sub>17 cell expansion *in vitro*. The administration of an EP4-selective antagonist to mice  
14  
15 with experimental autoimmune encephalomyelitis or contact hypersensitivity decreased  
16  
17 the accumulation of both T<sub>H</sub>1 and T<sub>H</sub>17 cells in regional lymph nodes and suppressed  
18  
19 disease progression. Based on these observations they concluded that PGE<sub>2</sub>-EP4  
20  
21 signaling promotes immune inflammation.  
22  
23

24  
25 In human conjunctival tissues EP4 protein was expressed in epithelial cells but  
26  
27 not in cells infiltrating subconjunctival tissues. We posit that the down-regulation of EP4  
28  
29 in conjunctival epithelium is associated with the ocular surface inflammation seen in  
30  
31 patients with OCP, SJS/TEN, and Mooren's ulcer.  
32  
33

34  
35 On the other hand, elsewhere we reported that although EP3 and EP2 agonists  
36  
37 suppressed the production of CCL5, CXCL11, and CCL20 in response to polyI:C  
38  
39 stimulation, these chemokines were not suppressed by the EP4 agonist in human  
40  
41 conjunctival epithelial cells [5]. Studies are underway in our laboratory to elucidate the  
42  
43 function of EP4 in conjunctival epithelial cells.  
44

45  
46 In summary, EP4 is expressed not only in normal conjunctival epithelium but also  
47  
48 in conjunctival epithelium from patients with chemical eye burns and some patients with  
49  
50 Mooren's ulcer. On the other hand, it is strongly down-regulated in conjunctival  
51  
52 epithelium from patients with OCP and chronic- and subacute SJS/TEN.  
53  
54  
55  
56  
57  
58  
59  
60

## Figure Legends

### Figure 1

The expression of PTGER4 mRNA in conjunctival tissues from patients with SJS/TEN, OCP and the controls.

- A. Representative findings of EP4 immunoreactivity in each group (control, SJS/TEN, OCP).
- B. Expression of PTGER4 mRNA in human conjunctival tissues (\*p < 0.05).

### Figure 2

Immunohistological analysis of prostaglandin E receptor subtype EP4 in conjunctival epithelium of patients with ocular surface diseases.

- A. Nearly normal conjunctival tissues from patients with conjunctivochalasis.
- B. Conjunctival tissues from patients with chemical eye burn requiring ocular surface reconstruction.
- C. Inflammatory conjunctival tissues from patients with active Mooren's ulcer requiring resection of the inflammatory conjunctiva.
- D. Conjunctival tissues from SJS/TEN patients in the sub-acute stage.
- E. Conjunctival tissues from a patient with severe GVHD.

Each scale bar represents 100  $\mu$ m.

## References

1. Matsuoka T, Narumiya S: **Prostaglandin receptor signaling in disease.** *ScientificWorldJournal* 2007, **7**:1329-1347.
2. Takayama K, Garcia-Cardena G, Sukhova GK, *et al.*: **Prostaglandin E2 suppresses chemokine production in human macrophages through the EP4 receptor.** *J Biol Chem* 2002, **277**:44147-44154.
3. Xu XJ, Reichner JS, Mastrofrancesco B, *et al.*: **Prostaglandin E2 suppresses lipopolysaccharide-stimulated IFN-beta production.** *J Immunol* 2008, **180**:2125-2131.
4. Shiraishi H, Yoshida H, Saeki K, *et al.*: **Prostaglandin E2 is a major soluble factor produced by stromal cells for preventing inflammatory cytokine production from dendritic cells.** *Int Immunol* 2008, **20**:1219-1229.
5. Ueta M, Matsuoka T, Yokoi N, *et al.*: **Prostaglandin E2 suppresses polyinosine-polycytidylic acid (polyI:C)-stimulated cytokine production via prostaglandin E2 receptor (EP) 2 and 3 in human conjunctival epithelial cells.** *Br J Ophthalmol* 2011, **95**:859-863.
6. Morimoto K, Sugimoto Y, Katsuyama M, *et al.*: **Cellular localization of mRNAs for prostaglandin E receptor subtypes in mouse gastrointestinal tract.** *Am J Physiol* 1997, **272**:G681-687.
7. Kabashima K, Saji T, Murata T, *et al.*: **The prostaglandin receptor EP4 suppresses colitis, mucosal damage and CD4 cell activation in the gut.** *J Clin Invest* 2002, **109**:883-893.
8. Ueta M, Sotozono C, Yokoi N, *et al.*: **Prostaglandin E receptor 4 expression in human conjunctival epithelium and its downregulation in devastating**

1  
2  
3  
4  
5 **ocular surface inflammatory disorders.** *Arch Ophthalmol* 2010,  
6  
7 **128**(10):1369-1371.

- 8  
9  
10 9. Yao C, Sakata D, Esaki Y, *et al*: **Prostaglandin E2-EP4 signaling promotes**  
11 **immune inflammation through Th1 cell differentiation and Th17 cell**  
12 **expansion.** *Nat Med* 2009, **15**:633-640.  
13  
14  
15  
16  
17  
18  
19  
20  
21  
22  
23  
24  
25  
26  
27  
28  
29  
30  
31  
32  
33  
34  
35  
36  
37  
38  
39  
40  
41  
42  
43  
44  
45  
46  
47  
48  
49  
50  
51  
52  
53  
54  
55  
56  
57  
58  
59  
60

## ACKNOWLEDGMENTS

We thank Chikako Endo for technical assistance. This work was supported in part by grants-in-aid for scientific research from the Japanese Ministry of Health, Labour and Welfare, the Japanese Ministry of Education, Culture, Sports, Science and Technology, CREST from JST, a research grant from the Kyoto Foundation for the Promotion of Medical Science, the Intramural Research Fund of Kyoto Prefectural University of Medicine, and an Immunological Research Grant from the Shimizu Foundation.

1  
2  
3  
4  
5 **Expression of prostaglandin E receptor subtype EP4 in conjunctival epithelium of**  
6  
7 **patients with ocular surface disorders: Case-control study**  
8  
9

10  
11 Mayumi Ueta, MD, PhD,<sup>a,b</sup> Chie Sotozono, MD, PhD,<sup>a</sup> Keiko Yamada, MD,<sup>a</sup>

12  
13 Norihiko Yokoi, MD, PhD,<sup>a</sup> Tsutomu Inatomi, MD, PhD,<sup>a</sup> Shigeru Kinoshita, MD, PhD<sup>a</sup>  
14  
15

16  
17  
18 <sup>a</sup>Department of Ophthalmology, Kyoto Prefectural University of Medicine, Kyoto,  
19  
20  
21 Japan

22  
23 <sup>b</sup>Research Center for Inflammation and Regenerative Medicine, Faculty of Life and  
24  
25 Medical Sciences, Doshisha University, Kyoto, Japan  
26  
27

28  
29  
30 **Corresponding author:**

31  
32 Mayumi Ueta, MD, PhD

33  
34 Department of Ophthalmology

35  
36 Kyoto Prefectural University of Medicine

37  
38 465 Kajiicho, Hirokoji

39  
40 Kawaramachi, Kamigyoku

41  
42 Kyoto 602-0841, Japan

43  
44 Telephone: 81-75-251-5578

45  
46 Fax: 81-75-251-5663

47  
48 e-mail: mueta@koto.kpu-m.ac.jp  
49  
50  
51  
52  
53  
54  
55  
56  
57  
58  
59  
60

**Key words**

Prostaglandin E receptor subtype EP4, human conjunctival epithelium, chemical eye burn, Mooren's ulcer

**Abbreviations**

EP4: Prostaglandin E receptor subtype EP4

SJS: Stevens-Johnson syndrome

TEN: Toxic epidermal necrolysis

GVHD: Graft versus host disease

OCP: Ocular cicatricial pemphigoid

RT-PCR: Reverse transcription polymerase chain reaction

PG: Prostaglandin

- 1) Substantial contributions to conception and design, acquisition of data, or analysis and interpretation of data: Mayumi Ueta, Chie Sotozono, Keiko Yamada, Norihiko Yokoi, Tsutomu Inatomi, Shigeru Kinoshita
- 2) Drafting the article or revising it critically for important intellectual content: Mayumi Ueta, Chie Sotozono, Keiko Yamada, Norihiko Yokoi, Tsutomu Inatomi, Shigeru Kinoshita
- 3) Final approval of the version to be published; Mayumi Ueta, Chie Sotozono, Keiko Yamada, Norihiko Yokoi, Tsutomu Inatomi, Shigeru Kinoshita

No additional data are available.

Competing interest statement: None



**Abstract**

**Objectives:** To confirm the down-regulation of PTGER4 mRNA in the conjunctiva of SJS/TEN and OCP patients and to examine the expression of its EP4 protein in the conjunctival epithelium of patients with various ocular surface disorders.

**Design:** Case-control study

**Setting & Participants:** We performed quantitative RT-PCR analysis of EP4 in conjunctival tissue sections from patients with SJS/TEN and OCP to confirm the down-regulation of EP4 mRNA expression. We also analyzed EP4 immunohistologically in other ocular surface disorders. Conjunctival tissues were obtained from patients undergoing surgical reconstruction of the ocular surface due to chemical eye burns, sub-acute- or chronic SJS/TEN, chronic ocular cicatricial pemphigoid (OCP), severe graft versus host disease (GVHD), and from patients with Mooren's ulcers treated by resection of the inflammatory conjunctiva.

**Primary and secondary outcome measures:** The expression of EP4 mRNA and EP4 protein assessed by quantitative RT-PCR assay and immunohistological methods.

**Results:** PTGER4 mRNA was significantly lower in conjunctival tissues from SJS and OCP patients than in the control conjunctivochalasis samples. EP4 protein was detected in conjunctival epithelium from patients with chemical eye burn and in control conjunctival epithelium from patients with conjunctivochalasis. Its expression varied in conjunctival epithelium from patients with Mooren's ulcer. We did not detect EP4 immunoreactivity in conjunctival epithelium from patients with subacute SJS/TEN, severe GVHD, chronic SJS/TEN, or OCP.

**Conclusions:** The strong down-regulation of EP4 expression in conjunctival epithelium from patients with OCP or SJS/TEN may be attributable to ocular surface inflammation.

## Introduction

The prostanoids PGD<sub>2</sub>, PGE<sub>2</sub>, PGF<sub>2α</sub>, PGI<sub>2</sub>, and TXA<sub>2</sub> are lipid mediators that form in response to various stimuli. They are released extracellularly immediately after their synthesis and they act by binding to a G-protein-coupled rhodopsin-type receptor on the surface of target cells [1]. PGE<sub>2</sub> is produced during inflammatory responses and it suppresses the production of cytokines and chemokines induced by lipopolysaccharide (LPS)-stimulated macrophages [2, 3] and dendritic cells [4]. Elsewhere we reported that PGE<sub>2</sub> modulates the expression of polyI:C-induced pro-inflammatory genes in human conjunctival epithelial cells [5].

There are four PGE receptor subtypes, EP1, EP2, EP3, and EP4. The intestinal epithelium has been reported to express EP4 mRNA [6] and intestinal homeostasis was maintained and the immune response down-regulated by EP4 [7]. **The ocular surface is also one of the mucosa that is in contact with commensal bacteria like the intestine. Therefore, we focused the expression of EP4 in human conjunctival epithelium and the difference of its expression between various ocular surface diseases.**

We documented that while normal human conjunctival epithelium expressed EP4 protein, it was down-regulated in devastating ocular surface inflammatory disorders such as chronic Stevens-Johnson syndrome (SJS)/toxic epidermal necrolysis (TEN) and chronic ocular cicatricial pemphigoid (OCP) [8]. Here we examined the mRNA expression of EP4 in the conjunctiva of SJS/TEN and OCP patients in the chronic stage to confirm that EP4 is down-regulated in their conjunctiva. We also examined the expression of EP4 protein in the conjunctival epithelium of patients with various ocular surface disorders such as chemical eye burn, Mooren's ulcer, severe graft versus host disease (GVHD), and of patients in the sub-acute stage of SJS/TEN.

## Materials and Methods

### *Human conjunctival tissues*

This study was approved by the Institutional Review Board of Kyoto Prefectural University of Medicine, Kyoto, Japan. All experiments were conducted in accordance with the principles set forth in the Helsinki Declaration.

For quantitative RT-PCR the controls were nearly normal conjunctival tissues obtained at surgery for conjunctivochalasis. We also prepared human conjunctival tissues from samples obtained during surgery to reconstruct the ocular surface in 4 patients in the chronic stage of SJS/TEN and 4 patients in the chronic stage of OCP.

The controls for immunohistochemical analyses were nearly normal conjunctival tissues obtained during surgery for conjunctivochalasis, a disease in which the conjunctiva relaxes due to aging, resulting in a foreign body sensation on the ocular surface. We also prepared human conjunctival tissues from samples obtained during surgery to reconstruct the ocular surface in 3 patients with chemical (alkali) eye burn (2 in the chronic- and one in the sub-acute stage), 2 patients with sub-acute SJS/TEN, one patient with severe GVHD, and from 4 patients with Mooren's ulcer undergoing resection of inflammatory conjunctiva. SJS/TEN, OCP, Mooren's ulcer, chemical burn, and GVHD are all ocular surface inflammatory diseases with persistent inflammation on the ocular surface not only in the acute- but also in the chronic stage.

### *Quantitative RT-PCR*

Total RNA was isolated from conjunctival tissue sections using the RNeasy mini kit (Qiagen) according to the manufacturer's instructions. The RT reaction was with the SuperScript<sup>TM</sup> preamplification kit (Invitrogen). Quantitative RT-PCR was on an

1  
2  
3  
4  
5 ABI-prism 7700 instrument (Applied Biosystems, Foster City, CA). The probes for  
6  
7 human PTGER4 and human GAPDH were from Applied Biosystems. For cDNA  
8  
9 amplification we performed PCR in a 25- $\mu$ l total volume that contained a 1- $\mu$ l cDNA  
10  
11 template in 2  $\times$  TaqMan universal PCR master mix (Applied Biosystems) at 50°C for 2  
12  
13 min and 95°C for 10 min, followed by 40 cycles at 95°C for 15 sec and 60°C for 1 min.  
14  
15 The results were analyzed with sequence detection software (Applied Biosystems). The  
16  
17 quantification data were normalized to the expression of the housekeeping gene GAPDH.  
18  
19  
20  
21  
22

### 23 *Immunohistochemistry*

24  
25 For EP4 staining we used rabbit polyclonal antibody to EP4 (Cayman Chemical  
26  
27 Co., Ann Arbor, MI). The secondary antibody (Biotin-SP-conjugated AffiniPure F(ab')<sub>2</sub>  
28  
29 fragment donkey anti-rabbit IgG (H+L), 1:500 dilution; Jackson Immuno Research,  
30  
31 Baltimore, MD) was applied for 30 min. The VECTASTAIN ABC reagent (Vector  
32  
33 Laboratories, Inc., Burlingame, CA) was used for increased sensitivity with peroxidase  
34  
35 substrate solution (DAB substrate kit; Vector) as a chromogenic substrate.  
36  
37  
38  
39  
40

### 41 *Data analysis*

42  
43 Data were expressed as the mean  $\pm$  SEM and evaluated by the Student's t-test using the  
44  
45 Microsoft Excel software program.  
46  
47  
48  
49  
50  
51  
52  
53  
54  
55  
56  
57  
58  
59  
60

## Results

We previously documented that EP4 protein expression was down-regulated in conjunctival epithelium of devastating ocular surface inflammatory disorders such as chronic SJS/TEN and chronic OCP [8]. In this study, to confirm the down-regulation of EP4 in the ocular surface of SJS/TEN and OCP patients we examined the expression of PTGER4 mRNA in control conjunctival tissues from 6 conjunctival chalasis patients and in conjunctival tissues from 4 SJS/TEN- and 4 OCP patients. Representative findings of EP4 immunoreactivity in each of these groups are shown in Fig. 1A. Although EP4 protein was detected in the control tissues, conjunctival epithelium from SJS- and OCP patients did not manifest EP4 immunoreactivity. PTGER4 mRNA was significantly lower in conjunctival tissues from SJS/TEN and OCP patients than in the control conjunctivochalasis samples (Fig. 1B).

Moreover, we examined the expression of EP4 protein in the conjunctival epithelium of patients with other various ocular surface disorders. EP4 protein was detected in nearly normal conjunctival epithelium from patients with conjunctivochalasis (Fig. 2A) and in conjunctival tissues from 3 patients with chemical eye burn (Fig. 2B). Its expression varied in conjunctival epithelium from 4 patients with Mooren's ulcer (Fig. 2C): in one patient it was similar to the control, in 2 it was slightly lower than in the control, and in the remaining patient it was not detected. There was no EP4 immunoreactivity in conjunctival epithelium from 2 patients with subacute SJS/TEN (Fig. 2D), a patient with severe GVHD (Fig. 2E) as same as patients with chronic SJS/TEN or OCP [8].

We found that, as in normal human conjunctival epithelium, EP4 is expressed in conjunctival epithelium from patients with chemical eye burn. On the other hand, EP4

1  
2  
3  
4  
5 immunoreactivity was not detected in conjunctival epithelium from patients with  
6  
7 SJS/TEN, OCP, or severe GVHD. We did not detect EP4 protein in cells infiltrating  
8  
9 subconjunctival tissues in any of the human conjunctival tissues we examined.  
10  
11  
12  
13  
14  
15  
16  
17  
18  
19  
20  
21  
22  
23  
24  
25  
26  
27  
28  
29  
30  
31  
32  
33  
34  
35  
36  
37  
38  
39  
40  
41  
42  
43  
44  
45  
46  
47  
48  
49  
50  
51  
52  
53  
54  
55  
56  
57  
58  
59  
60

For peer review only

## Discussion

Elsewhere we reported the expression of EP4 in normal human conjunctival epithelium and its down-regulation in conjunctival epithelium from patients with SJS/TEN and OCP [8]. Here we confirmed that in conjunctival tissues from SJS/TEN and OCP patients its mRNA expression was significantly down-regulated, and we also document that EP4 is expressed normally in conjunctival epithelium from patients with severe chemical eye burn which, like SJS/TEN and OCP, is a devastating ocular surface disorder.

On the ocular surface of patients with severe chemical eye burn, conjunctival invasion into the cornea may occur due to the stem cell deficiency of corneal epithelial cells. This results in devastating ocular surface disorders similar to OCP and SJS/TEN. However, in the conjunctiva of patients with severe chemical eye burns, EP4 expression was not down-regulated.

In patients with Mooren's ulcer, an ocular surface inflammatory disease, the expression of EP4 protein varied; in some patients it was down-regulated. In patients in the sub-acute stage of SJS/TEN with ocular surface inflammation, the expression of EP4 protein was remarkably down-regulated.

**Our results suggest that it is possible that EP4 in conjunctival epithelium might contribute the ocular surface homeostasis, while the EP4 could not necessarily be down-regulated in all devastating ocular surface disorders.**

Kabashima et al. [7] reported that in mice, EP4 deficiency impaired mucosal barrier function and induced the aggregation of lymphocytes and neutrophils in the colon, and that the administration of an EP4-selective agonist to wild-type mice ameliorated severe colitis. In mice treated with an EP4-selective antagonist the recovery from colitis

1  
2  
3  
4  
5 was suppressed, leading them to conclude that EP4 maintains intestinal homeostasis by  
6  
7 preserving mucosal integrity and down-regulating the immune response. On the other  
8  
9 hand, Yao et al. [9] found that PGE<sub>2</sub> acting on its receptor EP4 on T- and dendritic cells  
10  
11 not only facilitated T<sub>H</sub>1 cell differentiation but also amplified interleukin-23-mediated  
12  
13 T<sub>H</sub>17 cell expansion *in vitro*. The administration of an EP4-selective antagonist to mice  
14  
15 with experimental autoimmune encephalomyelitis or contact hypersensitivity decreased  
16  
17 the accumulation of both T<sub>H</sub>1 and T<sub>H</sub>17 cells in regional lymph nodes and suppressed  
18  
19 disease progression. Based on these observations they concluded that PGE<sub>2</sub>-EP4  
20  
21 signaling promotes immune inflammation.  
22  
23

24  
25 In human conjunctival tissues EP4 protein was expressed in epithelial cells but  
26  
27 not in cells infiltrating subconjunctival tissues. We posit that the down-regulation of EP4  
28  
29 in conjunctival epithelium is associated with the ocular surface inflammation seen in  
30  
31 patients with OCP, SJS/TEN, and Mooren's ulcer.  
32  
33

34 On the other hand, elsewhere we reported that although EP3 and EP2 agonists  
35  
36 suppressed the production of CCL5, CXCL11, and CCL20 in response to polyI:C  
37  
38 stimulation, these chemokines were not suppressed by the EP4 agonist in human  
39  
40 conjunctival epithelial cells [5]. Studies are underway in our laboratory to elucidate the  
41  
42 function of EP4 in conjunctival epithelial cells.  
43  
44

45 In summary, EP4 is expressed not only in normal conjunctival epithelium but also  
46  
47 in conjunctival epithelium from patients with chemical eye burns and some patients with  
48  
49 Mooren's ulcer. On the other hand, it is strongly down-regulated in conjunctival  
50  
51 epithelium from patients with OCP and chronic- and subacute SJS/TEN.  
52  
53  
54  
55  
56  
57  
58  
59  
60



## Figure Legends

### Figure 1

The expression of PTGER4 mRNA in conjunctival tissues from patients with SJS/TEN, OCP and the controls.

- A. Representative findings of EP4 immunoreactivity in each group (control, SJS/TEN, OCP).
- B. Expression of PTGER4 mRNA in human conjunctival tissues (\* $p < 0.05$ ).

### Figure 2

Immunohistological analysis of prostaglandin E receptor subtype EP4 in conjunctival epithelium of patients with ocular surface diseases.

- A. Nearly normal conjunctival tissues from patients with conjunctivochalasis.
- B. Conjunctival tissues from patients with chemical eye burn requiring ocular surface reconstruction.
- C. Inflammatory conjunctival tissues from patients with active Mooren's ulcer requiring resection of the inflammatory conjunctiva.
- D. Conjunctival tissues from SJS/TEN patients in the sub-acute stage.
- E. Conjunctival tissues from a patient with severe GVHD.

Each scale bar represents 100  $\mu\text{m}$ .

## References

1. Matsuoka T, Narumiya S: **Prostaglandin receptor signaling in disease.** *ScientificWorldJournal* 2007, **7**:1329-1347.
2. Takayama K, Garcia-Cardena G, Sukhova GK, *et al.*: **Prostaglandin E2 suppresses chemokine production in human macrophages through the EP4 receptor.** *J Biol Chem* 2002, **277**:44147-44154.
3. Xu XJ, Reichner JS, Mastrofrancesco B, *et al.*: **Prostaglandin E2 suppresses lipopolysaccharide-stimulated IFN-beta production.** *J Immunol* 2008, **180**:2125-2131.
4. Shiraishi H, Yoshida H, Saeki K, *et al.*: **Prostaglandin E2 is a major soluble factor produced by stromal cells for preventing inflammatory cytokine production from dendritic cells.** *Int Immunol* 2008, **20**:1219-1229.
5. Ueta M, Matsuoka T, Yokoi N, *et al.*: **Prostaglandin E2 suppresses polyinosine-polycytidylic acid (polyI:C)-stimulated cytokine production via prostaglandin E2 receptor (EP) 2 and 3 in human conjunctival epithelial cells.** *Br J Ophthalmol* 2011, **95**:859-863.
6. Morimoto K, Sugimoto Y, Katsuyama M, *et al.*: **Cellular localization of mRNAs for prostaglandin E receptor subtypes in mouse gastrointestinal tract.** *Am J Physiol* 1997, **272**:G681-687.
7. Kabashima K, Saji T, Murata T, *et al.*: **The prostaglandin receptor EP4 suppresses colitis, mucosal damage and CD4 cell activation in the gut.** *J Clin Invest* 2002, **109**:883-893.
8. Ueta M, Sotozono C, Yokoi N, *et al.*: **Prostaglandin E receptor 4 expression in human conjunctival epithelium and its downregulation in devastating**

1  
2  
3  
4  
5 **ocular surface inflammatory disorders.** *Arch Ophthalmol* 2010,  
6  
7 **128**(10):1369-1371.

- 8  
9  
10 9. Yao C, Sakata D, Esaki Y, *et al*: **Prostaglandin E2-EP4 signaling promotes**  
11 **immune inflammation through Th1 cell differentiation and Th17 cell**  
12 **expansion.** *Nat Med* 2009, **15**:633-640.  
13  
14  
15  
16  
17  
18  
19  
20  
21  
22  
23  
24  
25  
26  
27  
28  
29  
30  
31  
32  
33  
34  
35  
36  
37  
38  
39  
40  
41  
42  
43  
44  
45  
46  
47  
48  
49  
50  
51  
52  
53  
54  
55  
56  
57  
58  
59  
60

## ACKNOWLEDGMENTS

We thank Chikako Endo for technical assistance. This work was supported in part by grants-in-aid for scientific research from the Japanese Ministry of Health, Labour and Welfare, the Japanese Ministry of Education, Culture, Sports, Science and Technology, CREST from JST, a research grant from the Kyoto Foundation for the Promotion of Medical Science, the Intramural Research Fund of Kyoto Prefectural University of Medicine, and an Immunological Research Grant from the Shimizu Foundation.

1  
2  
3  
4  
5  
6  
7  
8  
9  
10  
11  
12  
13  
14  
15  
16  
17  
18  
19  
20  
21  
22  
23  
24  
25  
26  
27  
28  
29  
30  
31  
32  
33  
34  
35  
36  
37  
38  
39  
40  
41  
42  
43  
44  
45  
46  
47  
48  
49  
50  
51  
52  
53  
54  
55  
56  
57  
58  
59  
60

Figure 1

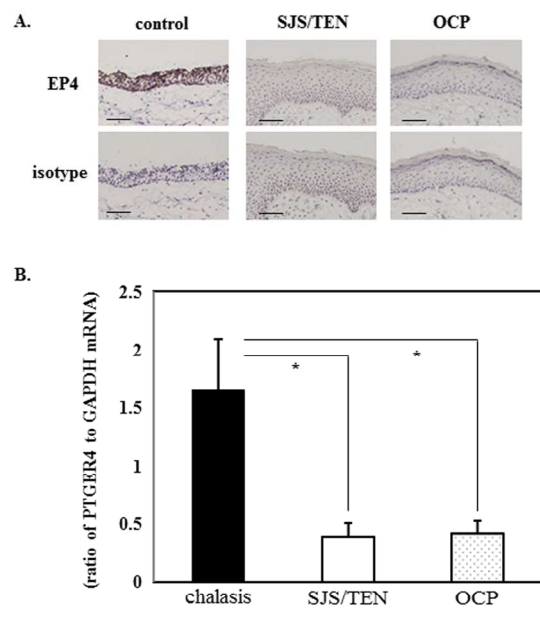

190x275mm (300 x 300 DPI)

Figure 2

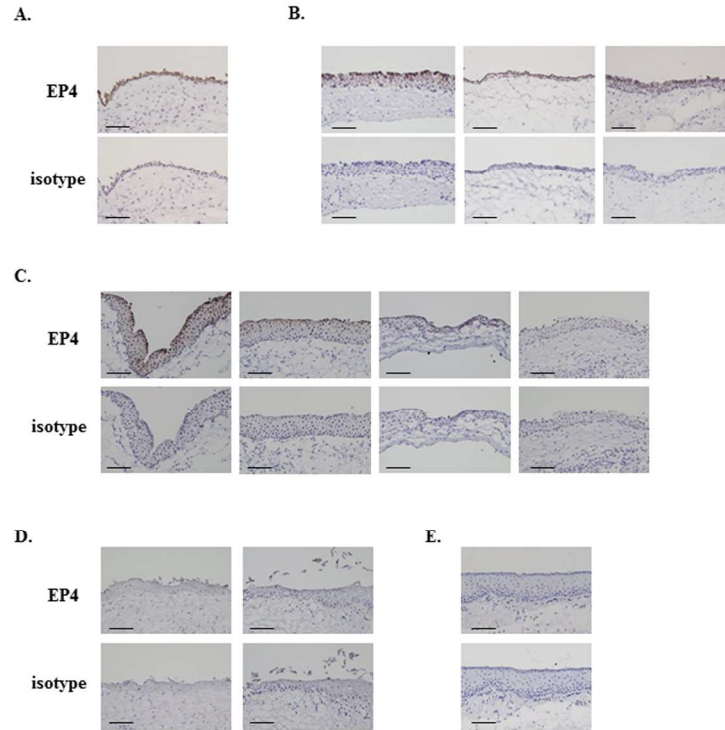

190x275mm (300 x 300 DPI)
